## **Assessing distinct patterns of cognitive aging using tissue-specific brain age prediction based on diffusion tensor imaging and brain morphometry**

Geneviève Richard<sup>a,b,c,\*</sup>, Knut Kolskår<sup>a,b,c</sup>, Anne-Marthe Sanders<sup>a,b,c</sup>, Tobias Kaufmann<sup>a</sup>, Anders Petersen<sup>d</sup>, Nhat Trung Doan<sup>a</sup>, Jennifer Monereo Sánchez<sup>a</sup>, Dag Alnæs<sup>a</sup>, Kristine M. Ulrichsen<sup>a,b,c</sup>, Erlend S. Dørum<sup>a,b,c</sup>, Ole A. Andreassen<sup>a</sup>, Jan Egil Nordvik<sup>c</sup>, Lars T. Westlye<sup>a,b,\*</sup>

<sup>a</sup> NORMENT, KG Jebsen Centre for Psychosis Research, Division of Mental Health and Addiction, Oslo University Hospital & Institute of Clinical Medicine, University of Oslo, Norway

<sup>b</sup> Department of Psychology, University of Oslo, Norway

<sup>c</sup> Sunnaas Rehabilitation Hospital HT, Nesodden, Norway

<sup>d</sup> Center for Visual Cognition, Department of Psychology, University of Copenhagen, Copenhagen, Denmark

### **\*Corresponding authors:**

Geneviève Richard & Lars T. Westlye

Email: [genevieve.richard@medisin.uio.no](mailto:genevieve.richard@medisin.uio.no), [l.t.westlye@psykologi.uio.no](mailto:l.t.westlye@psykologi.uio.no)

Postal address: Oslo University Hospital, P.O.Box 4956 Nydalen, 0424 OSLO, Norway

Telephone: +47 23 02 73 50, Fax: +47 23 02 73 33

### **Short title:**

Tissue-specific brain age prediction

### **Key words:**

Brain age, machine learning, white matter, gray matter, DTI, T1

### **Disclosures:**

The authors declare no competing financial interests.

1 **Abstract**

2 Multimodal imaging enables sensitive measures of the architecture and integrity of the human  
3 brain, but the high-dimensional nature of advanced brain imaging features poses inherent  
4 challenges for the analyses and interpretations. Multivariate age prediction reduces the  
5 dimensionality to one biologically informative summary measure with potential for assessing  
6 deviations from normal lifespan trajectories. A number of studies documented remarkably  
7 accurate age prediction, but the differential age trajectories and the cognitive sensitivity of  
8 distinct brain tissue classes have to a lesser extent been characterized.

9 Exploring differential brain age models driven by tissue-specific classifiers provides a  
10 hitherto unexplored opportunity to disentangle independent sources of heterogeneity in brain  
11 biology. We trained machine-learning models to estimate brain age using various  
12 combinations of FreeSurfer based morphometry and diffusion tensor imaging based indices of  
13 white matter microstructure in 612 healthy controls aged 18-87 years. To compare the tissue-  
14 specific brain ages and their cognitive sensitivity we applied each of the 11 models in an  
15 independent and cognitively well-characterized sample (n=265, 20-88 years). Correlations  
16 between true and estimated age in our test sample were highest for the most comprehensive  
17 brain morphometry ( $r=0.83$ , CI:0.78-0.86) and white matter microstructure ( $r=0.79$ , CI:0.74-  
18 0.83) models, confirming sensitivity and generalizability. The deviance from the  
19 chronological age were sensitive to performance on several cognitive tests for various models,  
20 including spatial Stroop and symbol coding, indicating poorer performance in individuals  
21 with an over-estimated age. Tissue-specific brain age models provide sensitive measures of  
22 brain integrity, with implications for the study of a range of brain disorders.

23

24

25

26

27

28

29

30

31

32

33

## 34 **Introduction**

35 Increasing age is a major risk factor for cognitive decline and neurodegeneration, and  
36 deviating lifespan trajectories in brain structure and function is a sensitive marker in several  
37 common neurological and mental disorders (Cole & Franke 2017). The maturing and aging  
38 brain is highly heterogeneous in term of individual trajectories and in term of brain regions  
39 and mechanisms involved (Fjell et al. 2013; Westlye et al. 2010b). Understanding the  
40 individual determinants and heterogeneity of the developing and aging brain is imperative for  
41 identifying persons at risk for various brain disorders, and for developing and applying  
42 effective and targeted treatments.

43 Exploring different modalities acquired by magnetic resonance imaging (MRI)  
44 provide a powerful tool to investigate age-related differences in both gray- and white- matter  
45 tissue classes across brain regions. However, the richness and complexity of the information  
46 provided by advanced imaging pipelines challenges its interpretation. Together, the  
47 multifactorial age-related variability and the richness of imaging measures have motivated the  
48 development of biologically informative summary measures based on brain imaging data.  
49 Using machine-learning to estimate the biological age of the brain based on neuroimaging  
50 data is one such approach (Cole & Franke 2017; Cole et al. 2018; Kaufmann et al. 2018).  
51 Deviation from the normative trajectory is a highly relevant biomarker for the integrity of the  
52 brain in healthy and clinical populations (Marquand et al. 2016; Wolfers et al. in press). Brain  
53 age gap is a heritable trait showing regionally specific genetic overlaps with major brain  
54 disorders, including schizophrenia and multiple sclerosis (Kaufmann et al. 2018), and  
55 accumulating evidence supports increased brain age in several clinical groups, including  
56 patients with schizophrenia (Kaufmann et al. 2018; Schnack et al. 2016), Alzheimer's disease  
57 (Amoroso et al. 2017; Kaufmann et al. 2018), HIV (Cole et al. 2017b; Kuhn et al. 2018)  
58 multiple sclerosis (Kaufmann et al. 2018) and cardiovascular risk factors (Franke et al. 2013;  
59 Habes et al. 2016). Indeed, while individuals with brains estimated as younger than their  
60 chronological age have been shown to be more physically active (Steffener et al. 2016),  
61 augmented brain age has been associated with poor health (Ronan et al. 2016), poor cognitive  
62 performance (Liem et al. 2017), early neurodegenerative diseases (Gaser et al. 2013), and  
63 increased mortality (Cole et al. 2017a). Less is known about the regional heterogeneity, i.e. to  
64 which degree different brain regions, systems or compartments show differential aging  
65 patterns and sensitivity to cognitive performance. Brain gray and white matter compartments,  
66 which can be assessed and quantified using T1-weighted imaging and diffusion tensor

67 imaging (DTI), respectively, comprise distinct tissue classes with largely differential  
68 biological and environmental modifiers and age trajectories (Bennett et al. 2010; Cao et al.  
69 2017; Fjell et al. 2013; Salat et al. 2005; Storsve et al. 2014; Westlye et al. 2010a; Westlye et  
70 al. 2010b). Therefore, allowing for differential brain age models for these distinct classes  
71 provides an opportunity to disentangle independent sources of heterogeneity in brain aging.

72 Thus, to identify common and unique aging patterns with potentially differential  
73 sensitivity to cognitive function, we aimed to test the complementary value of tissue-specific  
74 prediction by comparing brain age estimated using different combinations of FreeSurfer based  
75 morphometric measures (regional cortical thickness, surface area and volume) and white  
76 matter microstructure features (DTI based fractional anisotropy and mean, radial and axial  
77 diffusivity) across the brain. Based on previous studies on brain aging, we expected high  
78 accuracy and generalizability of the age prediction models (Cole & Franke 2017). Since tissue  
79 specific brain age models capture biologically distinct information, we anticipated that the  
80 different FreeSurfer based brain morphometry and white matter microstructure models would  
81 only partly reflect common variance, and therefore provide complementary information with  
82 differential sensitivity to cognitive performance. Given that brain age predictions might be  
83 sensitive to the overall integrity of the brain (Liem et al. 2017), we anticipated that individuals  
84 with an over-estimated brain age would show lower cognitive performance, in particular  
85 among the elderly, and that the tissue-specific brain age models would show partly  
86 differential cognitive sensitivity.

87 To ensure generalizability, we trained the models in a large publicly available training  
88 set (n=612, 18-87 years) and validated their performance using 10-fold cross-validation  
89 before applying to an independent and well characterized test set (n=265, 20-88 years). We  
90 assessed the cognitive sensitivity using linear and non-linear models with performance on a  
91 range of paper-and-pencil and computerized tests comprising different large-scale cognitive  
92 domains (processing speed, executive functioning, working memory, attention, and general  
93 intellectual abilities) and cognitive scores based on computational models as dependent  
94 variables and age, sex and brain age gap (BAG, estimated brain age minus chronological age)  
95 as independent variables. For transparency, we report results both at an uncorrected level and  
96 corrected using false discovery rate (FDR) and Bonferroni methods to control the error rate.

97  
98  
99

## 100 **Materials and methods**

101 Table 1 summarizes key demographics. We included data from healthy volunteers from two  
102 independent cohorts: (1) the Cambridge Centre for Ageing and Neuroscience (Cam-CAN)  
103 sample (<http://www.mrc-cbu.cam.ac.uk/datasets/camcan/>; (Shafto et al. 2014; Taylor et al.  
104 2017)) and (2) StrokeMRI, which is an ongoing study on the determinants of stroke recovery,  
105 brain health and successful aging (Dorum et al. 2016; Dorum et al. 2017). Figure 1 shows the  
106 age distribution for each sample.

107         Volunteers were recruited to Cam-CAN through a large-scale collaborative research  
108 project funded by the Biotechnology and Biological Sciences Research Council (BBSRC,  
109 grant number BB/H008217/1), the UK Medical Research Council and University of  
110 Cambridge. For more information, see [www.cam-can.org](http://www.cam-can.org). Among the 650 datasets made  
111 available, 17 were excluded based on missing or poor quality DTI data and 21 due to poor  
112 T1-weighted data quality. Data from the remaining 612 individuals (age 18-87, mean = 54.41,  
113 SD = 18.26, 314 females) were included.

114         Healthy individuals were recruited to StrokeMRI through advertisement in  
115 newspapers, social media and word-of-mouth. All participants completed a comprehensive  
116 cognitive assessment, multimodal MRI and blood sampling for clinical biochemical analysis,  
117 various biomarkers and genotyping. MRI and cognitive assessments were performed on two  
118 subsequent days. Exclusion criteria included history of stroke, dementia, or other neurologic  
119 and psychiatric diseases, alcohol- and substance abuse, medications significantly affecting the  
120 nervous system and counter indications for MRI. In addition, individuals scoring lower than  
121 25 on the Montreal Cognitive Assessment (MoCA; Nasreddine et al. 2005) were assessed for  
122 inclusion based on their age, level of education and performance on other cognitive tests. No  
123 participants were excluded based on a single low score. A neuroradiologist reviewed all scans  
124 and 14 participants with clinically significant abnormalities were excluded. Additional  
125 exclusion criteria included missing or incomplete MRI or cognitive data (n=2), or poor  
126 quality images (n=20). The remaining 265 participants (age 20-88, mean = 56.95, SD = 14.84,  
127 168 females) were included in further analyses. The study was approved by the Regional  
128 Committee for Medical and Health Research Ethics (South-East Norway), and conducted in  
129 accordance with the Helsinki declaration. All subjects signed an informed consent prior to  
130 participating and received a compensation for their participation.

131

132

133

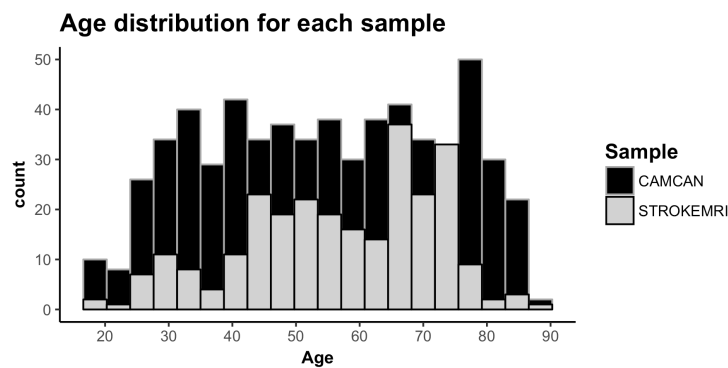

**Fig. 1** Histogram of the age distribution for each sample.

141

### 142 *Cognitive assessment in StrokeMRI*

143 Cognitive performance was assessed with a set of neuropsychological and computerized tests  
144 assumed to be sensitive to cognitive aging, including the MoCA, the vocabulary and matrix  
145 subtests of the Wechsler Abbreviated Scale of Intelligence (WASI; Wechsler 1999), the  
146 California Verbal Learning Test (CVLT-II; Delis et al. 2000), and the Delis-Kaplan Executive  
147 Function System (D-KEFS) color word interference test (Stroop; Delis et al. 2001). We  
148 included several computerized tests from the Cognitive Assessment at Bedside for iPad  
149 (CABPad; Willer et al. 2016), including motor speed, verbal fluency (phonological and  
150 semantic), working memory, spatial Stroop (executive control of attention), spatial attention  
151 span, and symbol digit coding tests. In addition, in order to assess the specificity of cognitive  
152 associations using computation modeling, we included three mathematically independent  
153 parameters based on the Theory of Visual Attention (TVA; Bundesen 1990; Bundesen &  
154 Habekost 2008), including short-term memory storage ( $K$ ), processing speed ( $C$ ), perceptual  
155 threshold ( $t_0$ ). These parameters based on computational modeling of response patterns have  
156 been shown to be sensitive to age, brain structure and function in healthy individuals  
157 (Espeseth et al. 2014; Wiegand et al. 2018) and a range of brain disorders (Habekost 2015;  
158 Habekost & Starrfelt 2009). Here, we used a TVA-based modeling of a whole report  
159 (Sperling 1960), in which six letters were briefly presented for different exposure durations  
160 and the participant's task was to accurately report as many letters as possible. Task error rate  
161 was also assessed (i.e. number of incorrect letters out of reported letters).

162

### 163 *MRI acquisition*

164 Cam-CAN participants were scanned on a 3T Siemens TIM Trio scanner with a 32-channel  
165 head-coil at Medical Research Council (UK) Cognition and Brain Sciences Unit (MRC-

166 CBSU) in Cambridge, UK. DTI data was acquired using a twice-refocused spin echo  
167 sequence with the following parameters a repetition time (TR) of 9100 ms, echo time (TE) of  
168 104 ms, field of view (FOV) of 192 x 192 mm, voxel size: 2 mm<sup>3</sup>, 66 axial slices using 30  
169 directions with b= 1000 s/mm<sup>2</sup>, 30 directions with b= 2000 s/mm<sup>2</sup>, and 3 b=0 images (Shafto  
170 et al. 2014). Only the b=[0,1000] were used in the current analysis. High-resolution 3D T1-  
171 weighted data was acquired using a magnetization prepared rapid gradient echo (MPRAGE)  
172 sequence with the following parameters: TR: 2250 ms, TE: 2.99 ms, inversion time (TI): 900  
173 ms, flip angle (FA): 9°, FOV of 256 x 240 x 192mm; voxel size =1 mm<sup>3</sup> isotropic, GRAPPA  
174 acceleration factor of 2, scan time 4:32 minutes (Shafto et al. 2014).

175         StrokeMRI participants were scanned on a 3T GE 750 Discovery MRI scanner with a  
176 32-channel head coil at Oslo University Hospital. Paddings were used to reduce head motion.  
177 DTI data were acquired using an echo planar imaging (EPI) sequence with the following  
178 parameters: TR/TE/flip angle: 8150 ms/83.1 ms/90°, FOV: 256 x 256 mm, slice thickness: 2  
179 mm, in-plane resolution: 2 mm, 60 directions (b=1000 s/mm<sup>2</sup>) and 5 b=0 volumes, scan time:  
180 8:58 min. In addition, 7 b=0 volumes with reversed phase-encoding direction were acquired.  
181 High-resolution T1-weighted data was acquired using a 3D IR-prepared FSPGR (BRAVO)  
182 with the following parameters: repetition time: 8.16 ms, echo time: 3.18 ms, flip angle: 12°,  
183 voxel size: 1 × 1 × 1 mm, field of view: 256 x 256 mm, 188 sagittal slices, scan time: 4:43  
184 minutes.

185

### 186 *DTI processing and analysis*

187 Diffusion MRI data from both samples were processed locally using the Oxford Center for  
188 Functional Magnetic Resonance Imaging of the Brain (FMRIB) Software Library (FSL)  
189 (<http://www.fmrib.ox.ac.uk/fsl>). To correct for geometrical distortions, motion and eddy  
190 currents, data were preprocessed using topup (<https://fsl.fmrib.ox.ac.uk/fsl/fslwiki/topup>) and  
191 eddy (<https://fsl.fmrib.ox.ac.uk/fsl/fslwiki/eddy>) respectively (Andersson et al. 2003; Smith et  
192 al. 2004). Topup uses information from the reversed phase-encoded image, resulting in pairs  
193 of images (blip-up, blip-down) with distortions going in opposite directions. From these  
194 image pairs the susceptibility-induced off-resonance field was estimated and the two images  
195 were combined into a single corrected one (Andersson et al. 2003; Smith et al. 2004). This  
196 step was performed on StrokeMRI data only. Eddy detects and replaces slices affected by  
197 signal loss due to bulk motion during diffusion encoding, which is performed within an  
198 integrated framework along with correction for susceptibility induced distortions, eddy

199 currents and motion (Andersson & Sotiropoulos 2016). Although these processing steps have  
200 been shown to strongly increase the temporal signal-to-noise ratio (tSNR) (Doan et al. 2017),  
201 we performed additional visual inspection to identify and remove poor quality data.

202 Fractional anisotropy (FA), eigenvector, and eigenvalue maps were calculated using  
203 dtifit in FSL. Mean diffusivity (MD) was defined as the mean of all three eigenvalues, radial  
204 diffusivity (RD) as the mean of the second and third eigenvalue, and axial diffusivity (AD) as  
205 the principal eigenvalue.

206 Voxelwise analysis of FA, MD, AD and RD were carried out using Tract-Based  
207 Spatial Statistics (TBSS; Smith et al. 2006), part of FSL (Smith et al. 2004). First, all subjects'  
208 FA data were aligned to a common space using the nonlinear registration tool FNIRT  
209 (Andersson et al. 2007a; Andersson et al. 2007b). Next, the mean FA image was created and  
210 thinned to create a mean FA skeleton, which represents the centers of all tracts common to all  
211 participants. Each subject's aligned FA data was then projected onto this skeleton and the  
212 resulting data fed into voxelwise cross-subject statistics. The same warping and  
213 skeletonization was repeated for MD, AD and RD. We thresholded and binarized the mean  
214 FA skeleton at  $FA > 0.2$ . For each individual, we calculated the mean skeleton FA, MD, AD  
215 and RD, as well as mean values within 23 regions of interest (ROIs) based on two  
216 probabilistic white matter atlases provided with FSL, i.e. the CBM-DTI-81 white-matter  
217 labels atlas and the JHU white-matter tractography atlas (Hua et al. 2008; Mori et al. 2005;  
218 Wakana et al. 2007), yielding a total of 96 DTI features per individual.

219

#### 220 *T1 processing*

221 T1-weighted images were processed using FreeSurfer 5.3 (<http://surfer.nmr.mgh.harvard.edu>;  
222 (Dale et al. 1999)) including brain extraction, intensity normalization, automated tissue  
223 segmentation, generation of white and pial surfaces (Dale et al. 1999). All reconstructions  
224 were visually assessed and corrected as appropriate. Cortical parcellation was performed  
225 using the Desikan–Killiany atlas (Desikan et al. 2006; Fischl et al. 2004) and subcortical  
226 segmentation was performed based on a probabilistic atlas (Fischl et al. 2002). In addition to  
227 global features (intracranial volume, total surface area, whole-cortex mean thickness), mean  
228 thickness, total surface area, and volume for each cortical ROI, as well as the volume of  
229 subcortical structures were computed yielding a set of 251 FreeSurfer based features.

230

231



232 *Age prediction*

233 Eleven different models were trained to estimate age based on the feature sets described  
234 above (one based on FreeSurfer T1 features, one based on WM DTI features, one including  
235 all T1 and DTI features, in addition to eight models based on a smaller subset of features,  
236 including models based on FA, MD, AD, RD, sub-cortical volume, volume, area and  
237 thickness to further explore the modality specificity of the estimations).

238 Due to the systematic differences in the brain features across scanners as well as non-  
239 linear effects of age, we fit a generalized additive model (GAM; Hastie 2017) for each feature  
240 and regressed out the effects of scanning site and age<sup>2</sup>, accounting all models for age and sex.  
241 In addition, we regressed out the estimated total intracranial volume from the area and volume  
242 features. Next, for each model, we created a training data matrix by concatenating all the  
243 features for all participants in the training sample (Cam-CAN), which were used as input to  
244 estimate age. We used the *xgboost* framework in R ([http://xgboost.readthedocs.io/en/latest/R-](http://xgboost.readthedocs.io/en/latest/R-package/xgboostPresentation.html)  
245 [package/xgboostPresentation.html](http://xgboost.readthedocs.io/en/latest/R-package/xgboostPresentation.html)), an efficient and scalable implementation of gradient  
246 boosting machine learning techniques, to build the prediction models. The following  
247 parameters were used: learning rate ( $\eta$ ) = 0.1, nround = 5000, gamma = 1, max\_depth = 6,  
248 subsample=0.5. To estimate the performance of our models, we used a 10-fold cross-  
249 validation procedure within the training sample and repeated the cross-validation step 1000  
250 times to provide a robust estimate of model predictive accuracy. Next, we tested the  
251 performance of our trained models by predicting age in unseen healthy subjects in the test  
252 sample (StrokeMRI).

253 For each feature set, we calculated the correlation between the predicted and the  
254 chronological age as a measure of the model performance, in addition to the mean absolute  
255 error (MAE, in years). For each individual, we calculated the discrepancy between the  
256 estimated and the chronological age, i.e. the BAG, for each model. The MAE was calculated  
257 from the BAG for each model. Since we were interested in the effect of BAG independently  
258 of age, the effect of age was regressed out for each BAG using linear models.

259

260 *Statistical analysis*

261 Statistical analysis was performed using R (<http://www.r-project.org>). For cognitive data, we  
262 used *outlierTest* from the *car* package (Fox & Weisberg 2011) to identify the most extreme  
263 observations based on a linear model, including age and sex. Twenty-five observations were  
264 identified as outliers and treated as missing values based on a Bonferroni corrected  $p < 0.05$ .

265 To visualize the associations between the cognitive tests and to form cognitive domain scores  
266 based on the correlation patterns, we performed hierarchical clustering using the default  
267 setting of the heatmap.2 package in gplots (Warnes et al. 2016), which uses hclust (Müllner  
268 2013) to form clusters based on the complete linkage method. Briefly, this is a step-wise  
269 clustering process that merges the two nearest clusters until only one single cluster remains,  
270 maximizing distance between individuals components between two clusters.

271 For each cognitive measure and summary score based on the clusters formed from the  
272 clustering step above, we used linear models to test for the effect of age and sex. Since  
273 cognitive performance may show non-linear associations with age, we performed an  
274 additional analysis including both age and age<sup>2</sup> in the models. Then, for each test showing a  
275 significant association with age, we tested whether adding BAG to the models lead to an  
276 improved model fit. More specifically, we tested for differential associations with cognitive  
277 function by comparing the parameter estimates for the different BAG models using Fisher z-  
278 transformation. To test the assumption that increased BAG is more relevant for cognitive  
279 function among the elderly, we tested for age by BAG interactions on cognitive performance.  
280 For transparency, we report both uncorrected p-values and p-values adjusted using FDR  
281 (Benjamini & Hochberg 1995; Wright 1992) and Bonferroni correction using a factor of 495  
282 (11 brain gaps and 45 cognitive features).

283

## 284 **Results**

### 285 *Brain age prediction*

286 10-fold cross-validation on the training sample revealed high correlations between  
287 chronological and predicted age for the DTI based white matter microstructure ( $r=0.87$ ) and  
288 FreeSurfer based morphometric ( $r=0.88$ ) models. Likewise, the correlations for FA ( $r=.76$ ),  
289 MD ( $r=.80$ ), AD ( $r=.83$ ), RD ( $r=.78$ ), sub-volume ( $r=.84$ ), volume ( $r=.80$ ), area ( $r=.70$ ) and  
290 thickness ( $r=.79$ ) based models also confirmed reasonable model performance.

291 Most models accurately predicted age in the independent test set. Figure 2A shows a  
292 correlation matrix for the 11 BAGs. Figure 2B shows the correlations between the  
293 chronological age and the predicted age in the test sample for each model with their  
294 confidence intervals, ranging from ( $r=.86$ , CI: .82-.89, MAE= 6.14) for the combined model to  
295  $r=.58$  (CI: .49-.65, MAE=10.24) for the model based on area. Figure 2 (D to F) show the  
296 estimated age from the three models that performed best among the 11 feature sets, i.e. the

297 combined DTI and T1 feature models ( $r=.86$ , CI: .82-.89, MAE= 6.14), the 251 FS T1 features  
 298 ( $r=.83$ , CI: .78-.86, MAE= 6.76), and the 96 WM DTI features ( $r=.79$ , CI: .74-.83, MAE=7.28).  
 299

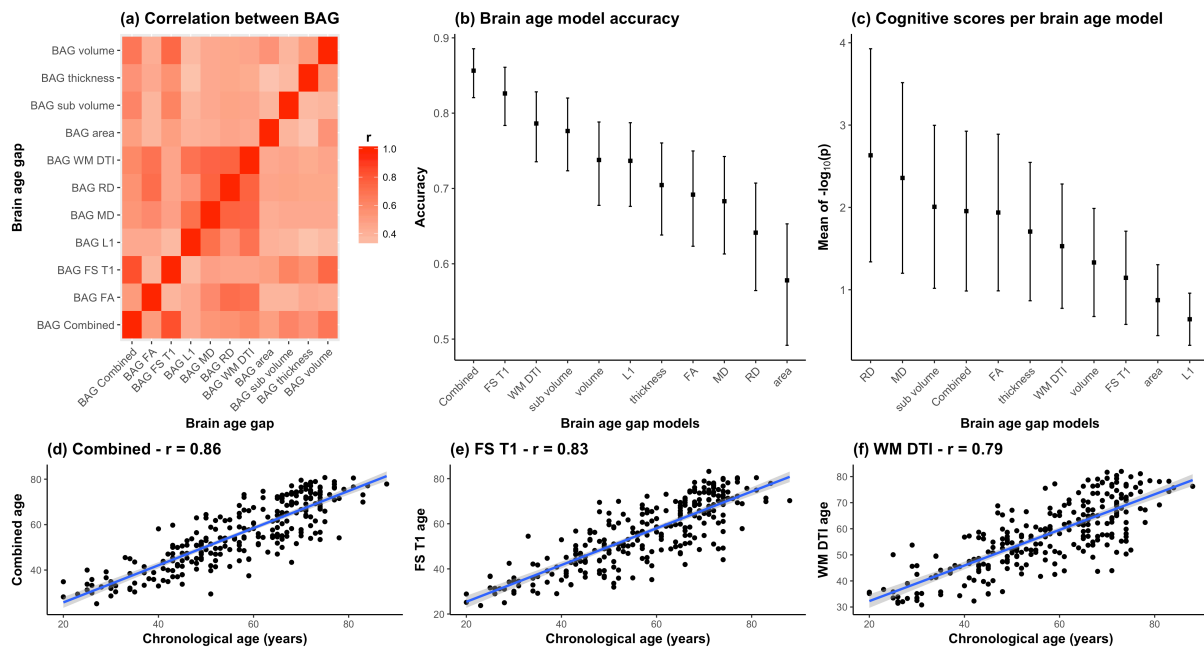

300  
 301 **Fig. 2** Comparison between the 11 BAG models. (a) Heatmap of the correlation between  
 302 different BAGs. (b) Correlations between the chronological age and the predicted age in the  
 303 test sample for each model with their confidence intervals. (c) Mean and standard error of the  
 304 45 p-values ( $-\log_{10}(p)$ ) for the cognitive scores and composite scores for each row (i.e.  
 305 BAGs), with a higher mean representing a stronger global association across tests. (d)  
 306 Correlation between the chronological age of each subjects and the combined age, (e) the  
 307 brain morphology age, and (f) the white matter microstructure age.

308  
 309  
 310 *Cognitive assessments and associations with BAGs*

311 Table 1 summarizes descriptive statistics and associations with age and sex for each of the 49  
 312 cognitive scores, derived features and domain scores. Linear models revealed 45 significant  
 313 associations with age after correcting for multiple comparisons, with the strongest effect sizes  
 314 for the symbol coding test, motor speed, spatial Stroop and spatial attention span. Since non-  
 315 linear models revealed significant associations with  $\text{age}^2$  only with the color word Stroop 3  
 316 (inhibition) and its derived scores (See supplementary Table S1), the main models presented  
 317 here are linear in order to keep the model to its simplest form. Figure 3 shows a correlation  
 318 matrix across all normalized cognitive scores with the variables sorted according to the

319 hierarchical clustering. Several variables were highly correlated, and the clustering solution  
 320 generally suggested seven broad cognitive domains including (Cluster 1) memory and  
 321 learning (CVLT, attention span, MoCA), (Cluster 2) visual processing speed (TVA  
 322 processing speed and perceptual threshold), (Cluster 3) verbal skills (phonological and  
 323 semantic flow), (Cluster 4) attentional control and speed (spatial Stroop), (Cluster 5)  
 324 executive control and speed (color-word Stroop), (Cluster 6) reasoning and psychomotor  
 325 speed (matrix, symbol coding and motor speed, short-term memory storage (TVA-parameter  
 326 K)), and (Cluster 7) working memory.  
 327

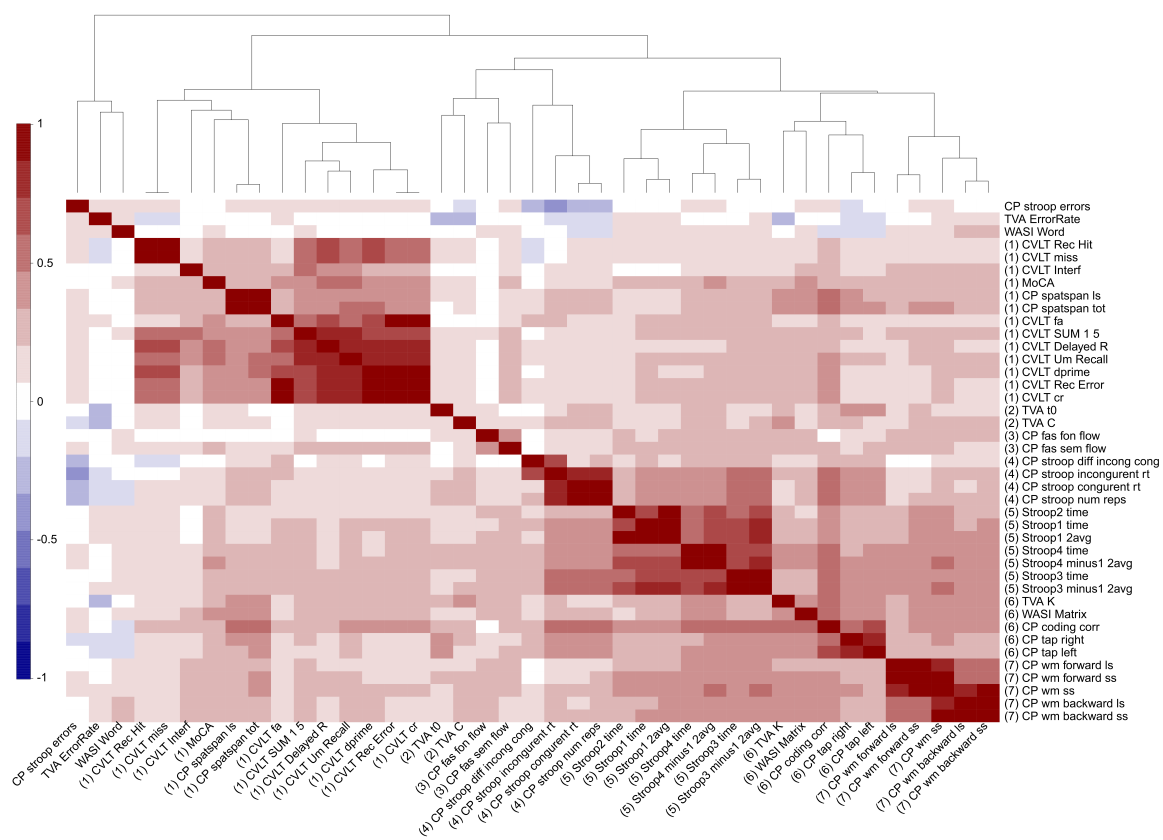

328  
 329 **Fig. 3** Hierarchical clustering of the cognitive features. Each cognitive score was normalized  
 330 and when required the scores were multiplied by -1 to ensure that positive scores represent  
 331 good performance. The higher panel shows the dendrogram resulting from the hierarchical  
 332 clustering of the scores in 7 cognitive domains.

333 Table 2 shows summary statistics for the associations between cognitive performance and  
 334 BAG using linear models, including age and sex as covariates. Figure 4 shows a heatmap of  
 335 the association between cognitive scores and brain age gaps for which the significant  
 336 associations have been marked with an asterisk. Supplementary Table S1 and Fig. S1 shows

337 the summary statistics and the heatmap of the associations between cognitive performance  
 338 and BAG using non-linear models. Figure 2C shows the mean and standard error of the 45 p-  
 339 values ( $-\log_{10}(p)$ ) for the cognitive scores and composite scores for each row (i.e. BAGs),  
 340 with a higher mean representing a stronger cumulative association across tests.

341 Figure 5 shows a scatter plot of the 2 strongest associations, which were found  
 342 between the most comprehensive model (all features combined) and spatial Stroop congruent  
 343 trials and number of responses, respectively, indicating poorer performance with higher BAG.  
 344 Fisher z-transformation revealed no statistically significant differences in the cognitive  
 345 associations between linear models using tissue-specific BAG. No significant interactions  
 346 were found between BAG and age on cognitive performance.

347

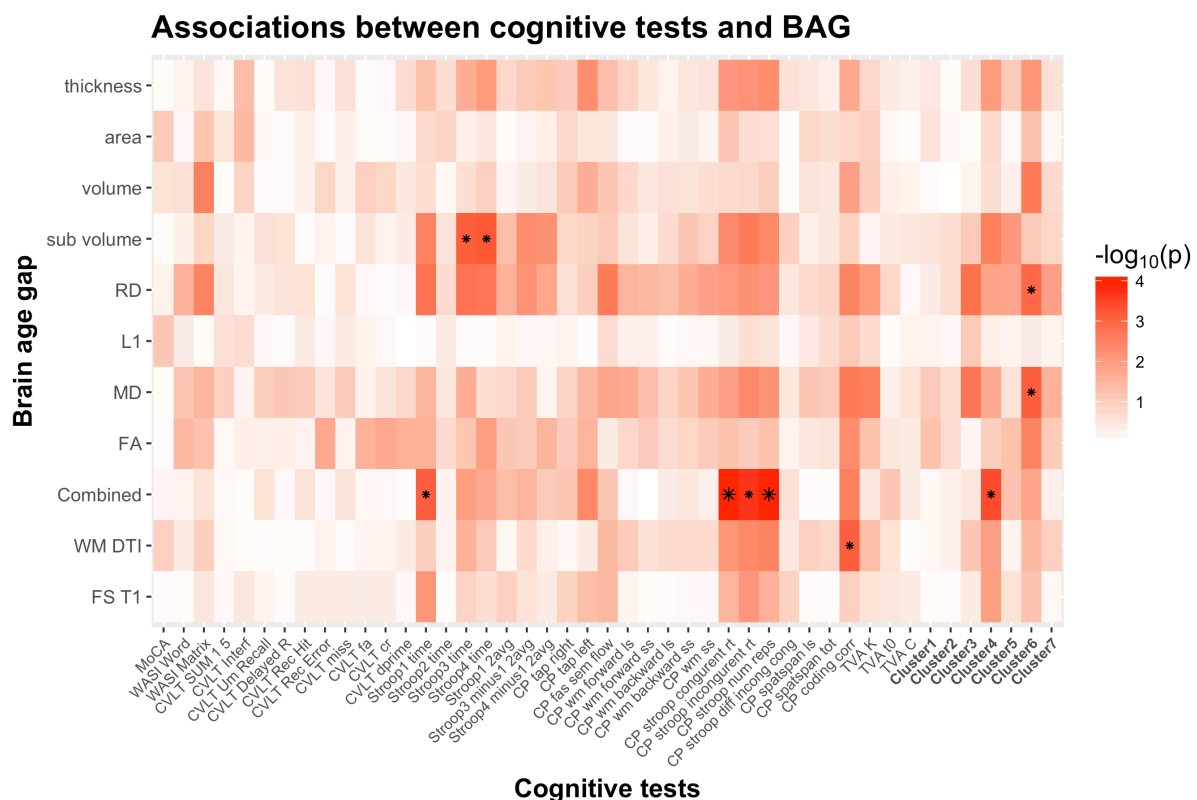

348

349 **Fig. 4** Heatmap of the association between cognitive scores and brain age gaps. The color  
 350 scale depicts the minus log of the p-values ( $-\log_{10}(p)$ ) for each association. The association  
 351 marked with a small star represents significant associations after FDR correction, and the one  
 352 marked with a big star shows significant associations after Bonferroni correction.

353

354

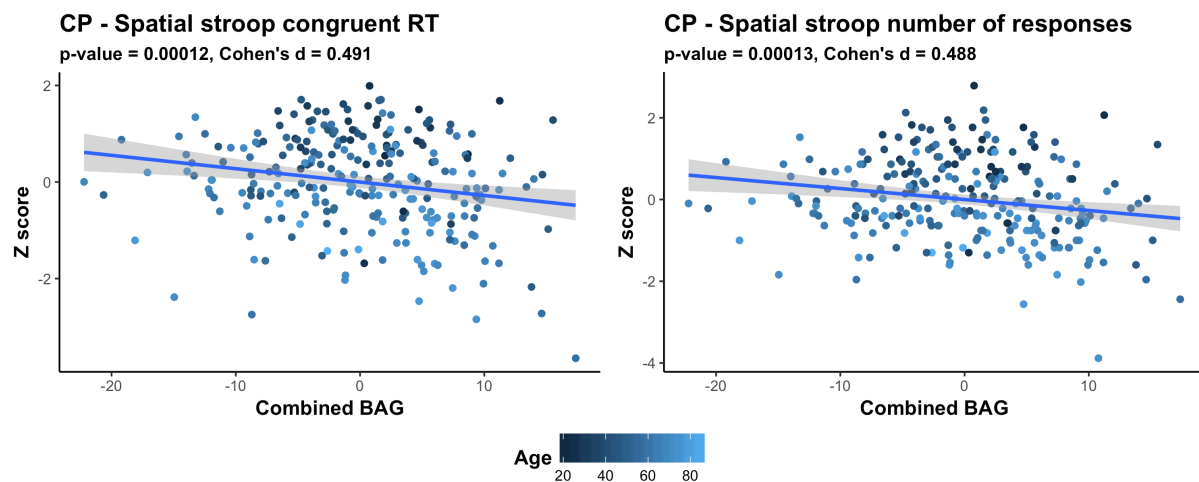

355

356 **Fig. 5** Scatter plots of the 2 strongest associations between cognitive measures and BAG. The  
357 color gradient represents the age where lighter color is assigned to older individuals, and  
358 darker color to younger individuals. All associations indicate worse performance with higher  
359 brain age gap.

360

## 361 Discussion

362 Brain aging is highly heterogeneous, and expanding our understanding of the biological  
363 determinants of human aging is imperative for reducing the burden of age-related cognitive  
364 decline and neurodegenerative disorders. An estimate of an individual's deviation from the  
365 expected lifespan trajectory in brain structure and function may provide a sensitive measure  
366 of individual brain integrity and health, both in presumably healthy individuals and in patients  
367 suffering from various brain disorders.

368 The biological heterogeneity of the brain strongly suggests that the concept of a single  
369 brain age is too simple, and that tissue-specific brain age models may provide increased  
370 sensitivity and specificity in relation to cognitive and mental functions. In line with this view,  
371 our main findings demonstrate that different combinations of FreeSurfer based brain  
372 morphometry and DTI based white matter microstructural indices can be used to accurately  
373 predict the age of individuals, but that the shared variance from the different models suggest  
374 that they reflect partly non-overlapping processes of brain aging. Further, the results revealed  
375 partly differential sensitivity to cognitive performance; with the strongest cumulative  
376 associations across cognitive tests for brain age gaps estimated using RD. Even though our  
377 data provide no strong evidence of independent associations with cognitive performance in  
378 the current sample of healthy individuals, tissue specific age prediction models might better

379 inform us about the individual determinants and heterogeneity of the aging brain compared to  
380 models collapsing several brain compartments by potentially capturing distinct measures of  
381 brain aging.

382

### 383 *Brain age prediction*

384 For the age prediction models, our results demonstrated that the 11 different combinations of  
385 FreeSurfer based morphometric measures (regional cortical thickness, surface area and  
386 volume) and white matter microstructure features (diffusion tensor imaging (DTI) based  
387 fractional anisotropy and mean, radial and axial diffusivity) across the brain age models  
388 accurately predicted the age of an individual with a mean absolute error between 6.14 and  
389 10.23 years. Brain morphometry and white matter microstructure models had a MAE of 6.76  
390 and 7.28 respectively, which correspond with previous publications (Cole et al. 2016; Han et  
391 al. 2014; Valizadeh et al. 2017). In general, combining features and modalities increased the  
392 performance, and the highest performing model included a combination of both brain  
393 morphometry and white matter microstructure (mean absolute error of 6.14 years). Moreover,  
394 the correlations between the different brain age gaps suggested a relatively low level of shared  
395 variance (mean correlation = 0.51, SD=0.13). Together these findings support the notion that  
396 tissue specific brain age models capture biologically distinct information. This is in line with  
397 the characteristic lifespan patterns of global linear decreases in gray matter volume and the  
398 nonlinear trajectories of total white matter volume and DTI based metrics of white matter  
399 microstructure (Cox et al. 2016; Fjell et al. 2013; Ge et al. 2002; Liu et al. 2017; Raz et al.  
400 2010; Westlye et al. 2010b), highlighting that the different compartments carry unique  
401 biological information and that combining different modalities lead to a better estimation the  
402 age of individuals (Cherubini et al. 2016; Liem et al. 2017; Madan & Kensinger 2018).

403

### 404 *Cognitive associations*

405 We performed a comprehensive cognitive assessment of the test sample, confirming previous  
406 evidence of substantial age-related differences in cognitive performance across a range of  
407 tests and domains. Hierarchical clustering of the cognitive features indicated a characteristic  
408 pattern of covariance, largely reflecting broad cognitive domains, including memory and  
409 learning, visual processing speed, verbal skills, attentional and executive control, reasoning  
410 and psychomotor speed, and working memory. Ninety percent of the included cognitive  
411 features showed age-differences, with the largest effect sizes observed for speed-based

412 measures, such as symbol coding test, which measures mental and visuo-motor speed (Willer  
413 et al. 2016). This is in line with the well-established literature on age-related decline in  
414 information processing speed in healthy aging (Bennett et al. 2010; Craik & Salthouse 2008;  
415 Harada et al. 2013). Importantly, not only tasks measuring reaction time, but also various  
416 TVA measures based on computational modeling, such as short-term memory storage ( $K$ ),  
417 processing speed ( $C$ ), and perceptual threshold ( $t_0$ ) showed strong associations with age, in  
418 line with previous studies (Espeseth et al. 2014; Habekost 2015; Habekost et al. 2013;  
419 McAvinue et al. 2012; Wiegand et al. 2018).

420         Based on the assumption that brain age captures variance related to the integrity of the  
421 brain, we anticipated that individuals with an over-estimated age would show lower cognitive  
422 performance, and that the tissue-specific brain age models would show partly differential  
423 sensitivity. To test these hypotheses, we used linear models to explore the associations  
424 between cognitive performance and BAG, with age and sex as covariates, and directly  
425 compared the parameter estimates from the different brain age models. We found a significant  
426 association between performance on several tests and BAG beyond the age associations,  
427 indicating lower performance in individuals with higher BAG. Briefly, one significant  
428 association was found for WM DTI, five for combined BAG, two for the sub-volume, one for  
429 the RD and one for the MD BAG. The strongest associations were found with the spatial  
430 Stroop congruent trials, and number of responses. These findings support that the deviance  
431 between the estimated age and the chronological age captures relevant biological information  
432 regarding the cognitive performance of an individual. Whereas we found no significantly  
433 different associations between brain age models, the association with symbol digit coding test  
434 was only seen for WM DTI BAG, while associations with Stroop 3 and 4 were observed only  
435 for sub-volume BAG, suggesting some specificity that should be investigated in future studies  
436 including larger samples and a broader spectrum of mental health, cognitive and brain  
437 phenotypes, both across healthy and clinical samples. We speculate that the contributions of  
438 the different modalities in predicting age and the associations with both cognitive  
439 performance, but also age-related illnesses vary across the age-span, as it does during  
440 maturational age (Brown et al. 2012). Thus, future studies might benefit from investigating  
441 modality specific brain-age estimation using specific age range.

442  
443  
444



445 *Limitations*

446 The present findings do not come without limitations. First, although reducing the  
447 dimensionality of complex brain imaging data to a biologically informative brain age is a  
448 powerful method to assess deviations from normal lifespan trajectories in brain health,  
449 findings from this data reduction method are limited in specificity. Here, we attempted to both  
450 reduce the complexity of the information while keeping some modality specificity measured  
451 by different MRI parameters. Finding a balance between specificity and precision represents  
452 an interesting challenge for future studies. Moreover, causality and individual level  
453 trajectories cannot be established based on cross-sectional data. Therefore, future longitudinal  
454 studies are needed to inform us about the relevance of the differential trajectories of the  
455 tissue-specific brain age prediction with implications for the study of a range of brain  
456 disorders. Next, although the age distribution of the test sample is irrelevant to the individual  
457 prediction accuracy, the relative overrepresentation of older individuals in the test sample is a  
458 limitation when investigating interactions between BAG and age. Thus, although the lack of  
459 brain by BAG interactions on cognitive function did not support our hypothesis that increased  
460 BAG is more relevant for cognitive function among the elderly, future studies including  
461 individuals across a broader range of function are needed to characterize the lifespan  
462 dynamics in the associations between brain and behavior. Although we covered a relatively  
463 broad spectrum of structural brain features, the link between imaging based indices of brain  
464 structure and brain function is elusive, and brain age models including other brain imaging  
465 features, including functional measures, might provide a sensitive supplement to the current  
466 models. Lastly, whereas the results showed some numerical differences in the cognitive  
467 sensitivity of the different combinations of FreeSurfer based morphometry and white matter  
468 microstructure models, these differences were not statistically significant, and the hypothesis  
469 that tissue specific models provide increased specificity in terms of cognitive associations  
470 remains to be further explored in future studies.

471 In conclusion, we have demonstrated that models based on different combinations of  
472 brain morphometry and white matter microstructural indices provide partly differential  
473 information about the aging brain, emphasizing the relevance of tissue-specific brain age  
474 models in the study of brain and mental function in health and disease.

475  
476  
477

478 **Acknowledgements**

479 This study was supported by the Norwegian ExtraFoundation for Health and Rehabilitation  
480 (2015/FO5146), the Research Council of Norway (249795, 248238), the South-Eastern  
481 Norway Regional Health Authority (2014097, 2015044, 2015073), Sunnaas Rehabilitation  
482 Hospital, and the Department of Psychology, University of Oslo, and approved by the  
483 Regional Committee for Medical and Health Research Ethics (South-East). Volunteers were  
484 recruited to StrokeMRI through advertisement in newspapers, social media and word-of-  
485 mouth. In addition, volunteers were recruited to Cam-CAN through a large-scale  
486 collaborative research project funded by the Biotechnology and Biological Sciences Research  
487 Council (BBSRC, grant number BB/H008217/1), the UK Medical Research Council and  
488 University of Cambridge.

489

490

491

492

493

494

495

496

497

498

499

500

501

502

503

504

505

506

507

508

509

510

511 **References**

- 512 Amoroso N, Diacono D, Fanizzi A, La Rocca M, Monaco A, Lombardi A, Guaragnella  
513 C, Bellotti R, Tangaro S, and Alzheimer's Disease Neuroimaging I. 2017. Deep learning  
514 reveals Alzheimer's disease onset in MCI subjects: results from an international challenge. *J*  
515 *Neurosci Methods*. 10.1016/j.jneumeth.2017.12.011
- 516 Andersson JLR, Jenkinson M, and Smith S. 2007a. TR07BP1: Non-linear optimisation.  
517 FMRIB Analysis Group Technical Reports: FMRIB Analysis Group.
- 518 Andersson JLR, Jenkinson M, and Smith S. 2007b. TR07JA2: Non-linear registration,  
519 aka spatial normalization. FMRIB Analysis Group Technical Reports: FMRIB Analysis  
520 Group.
- 521 Andersson JLR, Skare S, and Ashburner J. 2003. How to correct susceptibility  
522 distortions in spin-echo echo-planar images: application to diffusion tensor imaging.  
523 *Neuroimage* 20:870-888. 10.1016/S1053-8119(03)00336-7
- 524 Andersson JLR, and Sotiropoulos SN. 2016. An integrated approach to correction for  
525 off-resonance effects and subject movement in diffusion MR imaging. *Neuroimage* 125:1063-  
526 1078. 10.1016/j.neuroimage.2015.10.019
- 527 Benjamini Y, and Hochberg Y. 1995. Controlling the False Discovery Rate - a Practical  
528 and Powerful Approach to Multiple Testing. *Journal of the Royal Statistical Society Series B-*  
529 *Methodological* 57:289-300.
- 530 Bennett IJ, Madden DJ, Vaidya CJ, Howard DV, and Howard JH, Jr. 2010. Age-related  
531 differences in multiple measures of white matter integrity: A diffusion tensor imaging study  
532 of healthy aging. *Hum Brain Mapp* 31:378-390. 10.1002/hbm.20872
- 533 Brown TT, Kuperman JM, Chung Y, Erhart M, McCabe C, Hagler DJ, Jr.,  
534 Venkatraman VK, Akshoomoff N, Amaral DG, Bloss CS, Casey BJ, Chang L, Ernst TM,  
535 Frazier JA, Gruen JR, Kaufmann WE, Kenet T, Kennedy DN, Murray SS, Sowell ER,  
536 Jernigan TL, and Dale AM. 2012. Neuroanatomical assessment of biological maturity. *Curr*  
537 *Biol* 22:1693-1698. 10.1016/j.cub.2012.07.002
- 538 Bundesen C. 1990. A theory of visual attention. *Psychol Rev* 97:523-547.
- 539 Bundesen C, and Habekost T. 2008. Principles of Visual Attention: Linking Mind  
540 and Brain. *Oxford University Press*. 10.1093/acprof:oso/9780198570707.001.0001
- 541 Cao B, Mwangi B, Passos IC, Wu MJ, Keser Z, Zunta-Soares GB, Xu DP, Hasan KM,  
542 and Soares JC. 2017. Lifespan Gyrfication Trajectories of Human Brain in Healthy  
543 Individuals and Patients with Major Psychiatric Disorders. *Scientific Reports* 7. ARTN 511

- 544 10.1038/s41598-017-00582-1
- 545 Cherubini A, Caligiuri ME, Peran P, Sabatini U, Cosentino C, and Amato F. 2016.
- 546 Importance of Multimodal MRI in Characterizing Brain Tissue and Its Potential Application
- 547 for Individual Age Prediction. *Ieee Journal of Biomedical and Health Informatics* 20.
- 548 10.1109/Jbhi.2016.2559938
- 549 Cole JH, and Franke K. 2017. Predicting Age Using Neuroimaging: Innovative Brain
- 550 Ageing Biomarkers. *Trends Neurosci.* 10.1016/j.tins.2017.10.001
- 551 Cole JH, Marioni RE, Harris SE, and Deary IJ. 2018. Brain age and other bodily 'ages':
- 552 implications for neuropsychiatry. *Mol Psychiatry.* 10.1038/s41380-018-0098-1
- 553 Cole JH, Poudel RPK, Tsagkrasoulis D, Caan MWA, Steves C, Spector TD, and
- 554 Montana G. 2016. Predicting brain age with deep learning from raw imaging data results in a
- 555 reliable and heritable biomarker. *ARXIV.* 2016arXiv161202572C
- 556 Cole JH, Ritchie SJ, Bastin ME, Valdes Hernandez MC, Munoz Maniega S, Royle N,
- 557 Corley J, Pattie A, Harris SE, Zhang Q, Wray NR, Redmond P, Marioni RE, Starr JM, Cox
- 558 SR, Wardlaw JM, Sharp DJ, and Deary IJ. 2017a. Brain age predicts mortality. *Mol*
- 559 *Psychiatry.* 10.1038/mp.2017.62
- 560 Cole JH, Underwood J, Caan MWA, De Francesco D, van Zoest RA, Leech R, Wit
- 561 FWNM, Portegies P, Geurtsen GJ, Schmand BA, van der Loeff MFS, Franceschi C, Sabin
- 562 CA, Majoie CBLM, Winston A, Reiss P, Sharp DJ, and Collaboration C. 2017b. Increased
- 563 brain-predicted aging in treated HIV disease. *Neurology* 88:1349-1357.
- 564 10.1212/Wnl.0000000000003790
- 565 Cox SR, Ritchie SJ, Tucker-Drob EM, Liewald DC, Hagenaars SP, Davies G, Wardlaw
- 566 JM, Gale CR, Bastin ME, and Deary IJ. 2016. Ageing and brain white matter structure in
- 567 3,513 UK Biobank participants. *Nat Commun* 7:13629. 10.1038/ncomms13629
- 568 Craik FIM, and Salthouse TA. 2008. *The handbook of aging and cognition.* New York:
- 569 Psychology Press.
- 570 Dale AM, Fischl B, and Sereno MI. 1999. Cortical surface-based analysis - I.
- 571 Segmentation and surface reconstruction. *Neuroimage* 9:179-194. DOI
- 572 10.1006/nimg.1998.0395
- 573 Delis DC, Kaplan E, and Kramer JH. 2001. *Delis-Kaplan Executive Function*
- 574 *System: Technical Manual.* San Antonio, TX: Harcourt Assessment Company.
- 575 Delis DC, Kramer JH, Kaplan E, and Ober BA. 2000. *California Verbal Learning Test-*
- 576 *Second Edition (CVLT-II).* San Antonio, TX: Psychological Corporation.

577 Desikan RS, Segonne F, Fischl B, Quinn BT, Dickerson BC, Blacker D, Buckner RL,  
578 Dale AM, Maguire RP, Hyman BT, Albert MS, and Killiany RJ. 2006. An automated labeling  
579 system for subdividing the human cerebral cortex on MRI scans into gyral based regions of  
580 interest. *Neuroimage* 31:968-980. 10.1016/j.neuroimage.2006.01.021

581 Doan NT, Engvig A, Persson K, Alnaes D, Kaufmann T, Rokicki J, Cordova-Palomera  
582 A, Moberget T, Braekhus A, Barca ML, Engedal K, Andreassen OA, Selbaek G, and Westlye  
583 LT. 2017. Dissociable diffusion MRI patterns of white matter microstructure and connectivity  
584 in Alzheimer's disease spectrum. *Scientific Reports* 7. ARTN 45131  
585 10.1038/srep45131

586 Dorum ES, Alnaes D, Kaufmann T, Richard G, Lund MJ, Tonnesen S, Sneve MH,  
587 Mathiesen NC, Rustan OG, Gjertsen O, Vatn S, Fure B, Andreassen OA, Nordvik JE, and  
588 Westlye LT. 2016. Age-related differences in brain network activation and co-activation  
589 during multiple object tracking. *Brain and Behavior* 6. 10.1002/brb3.533

590 Dorum ES, Kaufmann T, Alnaes D, Andreassen OA, Richard G, Kolskar KK, Nordvik  
591 JE, and Westlye LT. 2017. Increased sensitivity to age-related differences in brain functional  
592 connectivity during continuous multiple object tracking compared to resting-state.  
593 *Neuroimage* 148:364-372. 10.1016/j.neuroimage.2017.01.048

594 Espeseth T, Vangkilde SA, Petersen A, Dyrholm M, and Westlye LT. 2014. TVA-based  
595 assessment of attentional capacities-associations with age and indices of brain white matter  
596 microstructure. *Front Psychol* 5:1177. 10.3389/fpsyg.2014.01177

597 Fischl B, Salat DH, Busa E, Albert M, Dieterich M, Haselgrove C, van der Kouwe A,  
598 Killiany R, Kennedy D, Klaveness S, Montillo A, Makris N, Rosen B, and Dale AM. 2002.  
599 Whole brain segmentation: Automated labeling of neuroanatomical structures in the human  
600 brain. *Neuron* 33:341-355. Doi 10.1016/S0896-6273(02)00569-X

601 Fischl B, van der Kouwe A, Destrieux C, Halgren E, Segonne F, Salat DH, Busa E,  
602 Seidman LJ, Goldstein J, Kennedy D, Caviness V, Makris N, Rosen B, and Dale AM. 2004.  
603 Automatically parcellating the human cerebral cortex. *Cerebral Cortex* 14:11-22.  
604 10.1093/cercor/bhg087

605 Fjell AM, Westlye LT, Grydeland H, Amlien I, Espeseth T, Reinvang I, Raz N, Holland  
606 D, Dale AM, Walhovd KB, and Alzheimer Disease Neuroimaging I. 2013. Critical ages in the  
607 life course of the adult brain: nonlinear subcortical aging. *Neurobiol Aging* 34:2239-2247.  
608 10.1016/j.neurobiolaging.2013.04.006

- 609 Fox J, and Weisberg S. 2011. An {R} Companion to Applied Regression. In: Second,  
610 editor. Thousand Oaks, CA: Sage.
- 611 Franke K, Gaser C, Manor B, and Novak V. 2013. Advanced BrainAGE in older adults  
612 with type 2 diabetes mellitus. *Frontiers in Aging Neuroscience* 5. ARTN 90  
613 10.3389/fnagi.2013.00090
- 614 Gaser C, Franke K, Kloppel S, Koutsouleris N, Sauer H, and Inati AsDN. 2013.  
615 BrainAGE in Mild Cognitive Impaired Patients: Predicting the Conversion to Alzheimer's  
616 Disease. *PLoS One* 8. ARTN e67346  
617 10.1371/journal.pone.0067346
- 618 Ge Y, Grossman RI, Babb JS, Rabin ML, Mannon LJ, and Kolson DL. 2002. Age-  
619 related total gray matter and white matter changes in normal adult brain. Part I: volumetric  
620 MR imaging analysis. *AJNR Am J Neuroradiol* 23:1327-1333.
- 621 Habekost T. 2015. Clinical TVA-based studies: a general review. *Front Psychol* 6:290.  
622 10.3389/fpsyg.2015.00290
- 623 Habekost T, and Starrfelt R. 2009. Visual attention capacity: a review of TVA-based  
624 patient studies. *Scand J Psychol* 50:23-32. 10.1111/j.1467-9450.2008.00681.x
- 625 Habekost T, Vogel A, Rostrup E, Bundesen C, Kyllingsbaek S, Garde E, Ryberg C, and  
626 Waldemar G. 2013. Visual processing speed in old age. *Scand J Psychol* 54:89-94.  
627 10.1111/sjop.12008
- 628 Habes M, Guray E, Toledo JB, Zhang T, Bryan RN, Janowitz D, Doshi J, von  
629 Sarnowski B, Hegenscheid K, Voelzke H, Schminke U, Hoffmann W, Grabe HJ, and  
630 Davatzikos C. 2016. Non-Resilient Brain Aging in Association with Cardiovascular Risk and  
631 White Matter Hyperintensities: The Ship Study. *Alzheimer's & Dementia* 12:P226-P227.  
632 10.1016/j.jalz.2016.06.407
- 633 Han CE, Peraza LR, Taylor JP, and Kaiser M. 2014. Predicting Age across Human  
634 Lifespan Based on Structural Connectivity from Diffusion Tensor Imaging. *2014 Ieee*  
635 *Biomedical Circuits and Systems Conference (Biocas)*:137-140.
- 636 Harada CN, Natelson Love MC, and Triebel KL. 2013. Normal cognitive aging. *Clin*  
637 *Geriatr Med* 29:737-752. 10.1016/j.cger.2013.07.002
- 638 Hastie T. 2017. gam: Generalized Additive Models.
- 639 Hua K, Zhang JY, Wakana S, Jiang HY, Li X, Reich DS, Calabresi PA, Pekar JJ, van  
640 Zijl PCM, and Mori S. 2008. Tract probability maps in stereotaxic spaces: Analyses of white

- 641 matter anatomy and tract-specific quantification. *Neuroimage* 39:336-347.  
642 10.1016/j.neuroimage.2007.07.053
- 643 Kaufmann T, van der Meer D, Doan NT, Schwarz E, Lund MJ, Agartz I, Alnæs D,  
644 Barch DM, Baur-Streubel R, Bertolino A, Bettella F, Beyer MK, Bøen E, Borgwardt S,  
645 Brandt CL, Buitelaar J, Celius EG, Cervenka S, Conzelmann A, Córdova-Palomera A, Dale  
646 AM, de Quervain DJF, Di Carlo P, Djurovic S, Dørum ES, Eisenacher S, Elvsashagen T,  
647 Espeseth T, Fatouros-Bergman H, Flyckt L, Franke B, Frei O, Haatveit B, Haberg AK, Harbo  
648 HF, Hartman CA, Heslenfeld D, Hoekstra PJ, Høgestøl EA, Jernigan T, Jonassen R, Jönsson  
649 EG, Kirsch P, Kloszewska I, Kolskar K-K, Landrø NI, Le Hellard S, Lesch K-P, Lovestone S,  
650 Lundervold A, Lundervold AJ, Maglanoc LA, Malt UF, Mecocci P, Melle I, Meyer-  
651 Lindenberg A, Moberget T, Norbom LB, Nordvik JE, Nyberg L, Oosterlaan J, Papalino M,  
652 Papassotiropoulos A, Pauli P, Pergola G, Persson K, Richard G, Rokicki J, Sanders A-M,  
653 Selbæk G, Shadrin AA, Smeland OB, Soininen H, Sowa P, Steen VM, Tsolaki M, Ulrichsen  
654 KM, Vellas B, Wang L, Westman E, Ziegler GC, Zink M, Andreassen OA, and Westlye LT.  
655 2018. Genetics of brain age suggest an overlap with common brain disorders. *bioRxiv*.  
656 Kuhn T, Kaufmann T, Doan NT, Westlye LT, Jones J, Nunez RA, Bookheimer SY,  
657 Singer EJ, Hinkin CH, and Thames AD. 2018. An augmented aging process in brain white  
658 matter in HIV. *Hum Brain Mapp*. 10.1002/hbm.24019
- 659 Liem F, Varoquaux G, Kynast J, Beyer F, Masouleh SK, Huntenburg JM, Lampe L,  
660 Rahim M, Abraham A, Craddock RC, Riedel-Heller S, Luck T, Loeffler M, Schroeter ML,  
661 Witte AV, Villringer A, and Margulies DS. 2017. Predicting brain-age from multimodal  
662 imaging data captures cognitive impairment. *Neuroimage* 148:179-188.  
663 10.1016/j.neuroimage.2016.11.005
- 664 Liu K, Yao S, Chen K, Zhang J, Yao L, Li K, Jin Z, and Guo X. 2017. Structural Brain  
665 Network Changes across the Adult Lifespan. *Front Aging Neurosci* 9:275.  
666 10.3389/fnagi.2017.00275
- 667 Madan CR, and Kensinger EA. 2018. Predicting age from cortical structure across the  
668 lifespan. *Eur J Neurosci* 47:399-416. 10.1111/ejn.13835
- 669 Marquand AF, Rezek I, Buitelaar J, and Beckmann CF. 2016. Understanding  
670 Heterogeneity in Clinical Cohorts Using Normative Models: Beyond Case-Control Studies.  
671 *Biol Psychiatry* 80:552-561. 10.1016/j.biopsych.2015.12.023

- 672 McAvinue LP, Habekost T, Johnson KA, Kyllingsbaek S, Vangkilde S, Bundesen C,  
673 and Robertson IH. 2012. Sustained attention, attentional selectivity, and attentional capacity  
674 across the lifespan. *Atten Percept Psychophys* 74:1570-1582. 10.3758/s13414-012-0352-6
- 675 Mori S, Wakana S, van Zijl PCM, and Nagae-Poetscher LM. 2005. MRI Atlas of  
676 Human White Matter. In: Science E, editor. 1st Edition ed: Elsevier Science. p 276.
- 677 Müllner D. 2013. {fastcluster}: Fast Hierarchical, Agglomerative Clustering Routines  
678 for {R} and {Python}. *Journal of Statistical Software* 53:1-18.
- 679 Nasreddine ZS, Phillips NA, Bedirian V, Charbonneau S, Whitehead V, Collin I,  
680 Cummings JL, and Chertkow H. 2005. The montreal cognitive assessment, MoCA: A brief  
681 screening tool for mild cognitive impairment. *Journal of the American Geriatrics Society*  
682 53:695-699. DOI 10.1111/j.1532-5415.2005.53221.x
- 683 Raz N, Ghisletta P, Rodrigue KM, Kennedy KM, and Lindenberger U. 2010.  
684 Trajectories of brain aging in middle-aged and older adults: regional and individual  
685 differences. *Neuroimage* 51:501-511. 10.1016/j.neuroimage.2010.03.020
- 686 Ronan L, Alexander-Bloch AF, Wagstyl K, Farooqi S, Brayne C, Tyler LK, Fletcher  
687 PC, and Cam-CAN. 2016. Obesity associated with increased brain age from midlife.  
688 *Neurobiology of Aging* 47:63-70. 10.1016/j.neurobiolaging.2016.07.010
- 689 Salat DH, Tuch DS, Greve DN, van der Kouwe AJW, Hevelone ND, Zaleta AK, Rosen  
690 BR, Fischl B, Corkin S, Rosas HD, and Dale AM. 2005. Age-related alterations in white  
691 matter microstructure measured by diffusion tensor imaging. *Neurobiology of Aging* 26:1215-  
692 1227. 10.1016/j.neurobiolaging.2004.09.017
- 693 Schnack HG, van Haren NE, Nieuwenhuis M, Hulshoff Pol HE, Cahn W, and Kahn RS.  
694 2016. Accelerated Brain Aging in Schizophrenia: A Longitudinal Pattern Recognition Study.  
695 *Am J Psychiatry* 173:607-616. 10.1176/appi.ajp.2015.15070922
- 696 Shafto MA, Tyler LK, Dixon M, Taylor JR, Rowe JB, Cusack R, Calder AJ, Marslen-  
697 Wilson WD, Duncan J, Dalgleish T, Henson RN, Brayne C, Matthews FE, and Cam-CAN.  
698 2014. The Cambridge Centre for Ageing and Neuroscience (Cam-CAN) study protocol: a  
699 cross-sectional, lifespan, multidisciplinary examination of healthy cognitive ageing. *Bmc*  
700 *Neurology* 14. ARTN 204  
701 10.1186/s12883-014-0204-1
- 702 Smith SM, Jenkinson M, Johansen-Berg H, Rueckert D, Nichols TE, Mackay CE,  
703 Watkins KE, Ciccarelli O, Cader MZ, Matthews PM, and Behrens TEJ. 2006. Tract-based



- 704 spatial statistics: Voxelwise analysis of multi-subject diffusion data. *Neuroimage* 31:1487-  
705 1505. 10.1016/j.neuroimage.2006.02.024
- 706 Smith SM, Jenkinson M, Woolrich MW, Beckmann CF, Behrens TEJ, Johansen-Berg  
707 H, Bannister PR, De Luca M, Drobnjak I, Flitney DE, Niazy RK, Saunders J, Vickers J,  
708 Zhang YY, De Stefano N, Brady JM, and Matthews PM. 2004. Advances in functional and  
709 structural MR image analysis and implementation as FSL. *Neuroimage* 23:S208-S219.  
710 10.1016/j.neuroimage.2004.07.051
- 711 Sperling G. 1960. The information available in brief visual presentations. *Psychological*  
712 *Monographs: General and Applied* 74:1-29. 10.1037/h0093759
- 713 Steffener J, Habeck C, O'Shea D, Razlighi Q, Bherer L, and Stern Y. 2016. Differences  
714 between chronological and brain age are related to education and self-reported physical  
715 activity. *Neurobiology of Aging* 40:138-144. 10.1016/j.neurobiolaging.2016.01.014
- 716 Storsve AB, Fjell AM, Tamnes CK, Westlye LT, Overbye K, Aasland HW, and  
717 Walhovd KB. 2014. Differential Longitudinal Changes in Cortical Thickness, Surface Area  
718 and Volume across the Adult Life Span: Regions of Accelerating and Decelerating Change.  
719 *Journal of Neuroscience* 34:8488-8498. 10.1523/Jneurosci.0391-14.2014
- 720 Taylor JR, Williams N, Cusack R, Auer T, Shafto MA, Dixon M, Tyler LK, Cam C,  
721 and Henson RN. 2017. The Cambridge Centre for Ageing and Neuroscience (Cam-CAN) data  
722 repository: Structural and functional MRI, MEG, and cognitive data from a cross-sectional  
723 adult lifespan sample. *Neuroimage* 144:262-269. 10.1016/j.neuroimage.2015.09.018
- 724 Valizadeh SA, Hanggi J, Merillat S, and Jancke L. 2017. Age prediction on the basis of  
725 brain anatomical measures. *Hum Brain Mapp* 38:997-1008. 10.1002/hbm.23434
- 726 Wakana S, Caprihan A, Panzenboeck MM, Fallon JH, Perry M, Gollub RL, Hua KG,  
727 Zhang JY, Jiang HY, Dubey P, Blitz A, van Zijl P, and Mori S. 2007. Reproducibility of  
728 quantitative tractography methods applied to cerebral white matter. *Neuroimage* 36:630-644.  
729 10.1016/j.neuroimage.2007.02.049
- 730 Warnes GR, Bolker B, Bonebakker L, Gentleman R, Liaw WHA, Lumley T, Maechler  
731 M, Magnusson A, Moeller S, Schwartz M, and Venables B. 2016. *gplots: Various R*  
732 *Programming Tools for Plotting Data*.
- 733 Wechsler D. 1999. *Wechsler Abbreviated Scale of Intelligence (WASI)*: Psychological  
734 Corporation.
- 735 Westlye LT, Walhovd KB, Dale AM, Bjornerud A, Due-Tonnessen P, Engvig A,  
736 Grydeland H, Tamnes CK, Ostby Y, and Fjell AM. 2010a. Differentiating maturational and

737 aging-related changes of the cerebral cortex by use of thickness and signal intensity.  
738 *Neuroimage* 52:172-185. 10.1016/j.neuroimage.2010.03.056

739 Westlye LT, Walhovd KB, Dale AM, Bjornerud A, Due-Tonnessen P, Engvig A,  
740 Grydeland H, Tamnes CK, Ostby Y, and Fjell AM. 2010b. Life-Span Changes of the Human  
741 Brain White Matter: Diffusion Tensor Imaging (DTI) and Volumetry. *Cerebral Cortex*  
742 20:2055-2068. 10.1093/cercor/bhp280

743 Wiegand I, Lauritzen MJ, Osler M, Mortensen EL, Rostrup E, Rask L, Richard N,  
744 Horwitz A, Benedek K, Vangkilde S, and Petersen A. 2018. EEG correlates of visual short-  
745 term memory in older age vary with adult lifespan cognitive development. *Neurobiol Aging*  
746 62:210-220. 10.1016/j.neurobiolaging.2017.10.018

747 Willer L, Pedersen PM, Forchhammer HB, and Christensen HK. 2016. Cognitive  
748 assessment at bedside for iPad: A preliminary validation of a novel cognitive test for stroke  
749 patients. *European Stroke Journal* 1:294-301. 10.1177/2396987316665233

750 Wolfers T, Doan NT, Kaufmann T, Alnæs D, Moberget T, Agartz I, Buitelaar J, Ueland  
751 T, Melle I, Beckmann CF, Franke B, Andreassen OA, Westlye LT, and Marquand A. in press.  
752 Extensive interindividual differences in schizophrenia and bipolar disorder: mapping  
753 biological heterogeneity in reference to normative brain ageing *JAMA Psychiatry*.

754 Wright SP. 1992. Adjusted P-Values for Simultaneous Inference. *Biometrics* 48:1005-  
755 1013. Doi 10.2307/2532694

756  
757  
758  
759  
760  
761  
762  
763  
764  
765  
766  
767  
768  
769

770 **Figure legends**

771 **Fig. 1** Histogram of the age distribution for each sample.

772

773 **Fig. 2** Comparison between the 11 BAG models. (a) Heatmap of the correlation between  
774 different BAGs. (b) Correlations between the chronological age and the predicted age in the  
775 test sample for each model with their confidence intervals. (c) Mean and standard error of the  
776 45 p-values ( $-\log_{10}(p)$ ) for the cognitive scores and composite scores for each row (i.e.  
777 BAGs), with a higher mean representing a stronger global association across tests. (d)  
778 Correlation between the chronological age of each subjects and the combined age, (e) the  
779 brain morphometry age, and (f) the white matter microstructure age.

780

781 **Fig. 3** Hierarchical clustering of the cognitive features. Each cognitive score was normalized  
782 and when required the scores were multiplied by -1 to ensure that positive scores represent  
783 good performance. The higher panel shows the dendrogram resulting from the hierarchical  
784 clustering of the scores in 7 cognitive domains.

785

786 **Fig. 4** Heatmap of the association between cognitive scores and brain age gaps. The color  
787 scale depicts the minus log of the p-values ( $-\log_{10}(p)$ ) for each association. The association  
788 marked with a small star represents significant associations after FDR correction, and the one  
789 marked with a big star shows significant associations after Bonferroni correction.

790

791 **Fig. 5** Scatter plots of the 2 strongest associations between cognitive measures and BAG. The  
792 color gradient represents the age where lighter color is assigned to older individuals, and  
793 darker color to younger individuals. All associations indicate worse performance with higher  
794 brain age gap.

795

796

797

798

799

800

801

802 **Table legends**

803 **Table 1.** Demographics and cognitive information. \* significant associations between  
804 cognitive measures with age after FDR correction, \*\* significant associations between  
805 cognitive measures with age after Bonferroni correction

806

807 **Table 2.** Cognitive associations with Brain Age Gap (BAG) – statistics. \* FDR significant \*\*  
808 Bonferroni significant

809

810

811

812 **Supplementary Materials**

813 **Fig. S1.** Heatmap of the association between cognitive scores and brain age gaps using non-  
814 linear models, including age, age<sup>2</sup> and sex as covariates. The color scale depicts the minus log  
815 of the p-values ( $-\log_{10}(p)$ ) for each association. The association marked with a small star  
816 represents significant associations after FDR correction, and the one marked with a big star  
817 shows significant associations after Bonferroni correction.

818

819 **Table S1.** Cognitive associations with Brain Age Gap (BAG) using non-linear models,  
820 including age, age<sup>2</sup> and sex as covariates – statistics. \* FDR significant \*\* Bonferroni  
821 significant.

822

823

824

825

826

827

828

829

830

831

832

833

834

835 **Tables**

836 **Demographics and cognitive information**

|                              | Cam-CAN       | StrokeMRI<br>Mean (SD) | Range (IQR)        | Main effect Age<br><i>t</i> ( <i>p</i> ) | Main effect Sex<br><i>t</i> ( <i>p</i> ) |
|------------------------------|---------------|------------------------|--------------------|------------------------------------------|------------------------------------------|
| Total N (% females)          | 612 (51.3%)   | 265 (63.4%)            |                    |                                          |                                          |
| Mean age (SD)                | 54.41 (18.26) | 56.95 (14.84)          |                    |                                          |                                          |
| Age range                    | 18-87         | 20-88                  |                    |                                          |                                          |
| MoCA                         | -             | 27.60 (1.72)           | 21 – 30 (2)        | -4.57 (<0.001)**                         | -2.32 (0.021)                            |
| WASI words                   | -             | 65.27 (6.60)           | 44 – 79 (10)       | 4.72 (<0.001)**                          | 0.10 (0.920)                             |
| WASI matrix                  | -             | 25.39 (5.64)           | 7 – 35 (6)         | -7.60 (<0.001)**                         | -0.28 (0.776)                            |
| CVLT learning 1-5            | -             | 48.92 (11.37)          | 17 – 73 (15.5)     | -5.05 (<0.001)**                         | -5.26 (<0.001)                           |
| CVLT interference            | -             | 5.53 (2.15)            | 0 – 13 (3)         | -4.33 (<0.001)**                         | -0.41 (0.681)                            |
| CVLT recall                  | -             | 10.83 (3.42)           | 0 – 16 (5)         | -6.50 (<0.001)**                         | 5.94 (<0.001)                            |
| CVLT delayed recall          | -             | 11.39 (3.44)           | 0 – 16 (5)         | -4.97 (<0.001)**                         | -5.51 (<0.001)                           |
| CVLT recognition hit         | -             | 14.70 (1.50)           | 8 – 16 (2)         | -2.62 (0.0093)*                          | -2.68 (0.008)                            |
| CVLT recognition errors      | -             | 3.79 (3.92)            | 0 – 18 (4)         | 5.22 (<0.001)**                          | 4.18 (<0.001)                            |
| CVLT recog misses            | -             | 1.30 (1.49)            | 0 – 8 (2)          | 2.62 (0.0093)*                           | 2.68 (0.008)                             |
| CVLT recog false alarm       | -             | 2.46 (3.48)            | 0 – 18 (3)         | 4.45 (<0.001)**                          | 3.59 (0.0004)                            |
| CVLT recog correct rejection | -             | 44.20 (3.92)           | 30 – 48 (4)        | -5.22 (<0.001)**                         | -4.18 (<0.001)                           |
| CVLT d'                      | -             | 2.97 (0.72)            | 0.97 – 3.90 (1.11) | -5.01 (<0.001)**                         | -4.50 (<0.001)                           |
| STROOP 1                     | -             | 31.14 (5.66)           | 21 – 50 (7)        | 5.05 (<0.001)**                          | 2.44 (0.015)                             |
| STROOP 2                     | -             | 22.12 (3.49)           | 14 – 35 (4)        | 2.89 (0.004)*                            | 2.27 (0.024)                             |
| STROOP 3                     | -             | 55.86 (14.13)          | 10 – 108 (15)      | 7.55 (<0.001)**                          | 2.97 (0.003)                             |
| STROOP 4                     | -             | 61.74 (14.85)          | 33 – 117 (19)      | 7.51 (<0.001)**                          | 1.77 (0.078)                             |
| STROOP mean 1 and 2          | -             | 26.54 (4.16)           | 18.5 – 42 (5)      | 4.47 (<0.001)**                          | 2.47 (0.014)                             |
| STROOP 3 minus mean 1 and 2  | -             | 81.94 (16.51)          | 34.5 – 145 (18.5)  | 7.31 (<0.001)**                          | 3.02 (0.003)                             |
| STROOP 4 minus mean 1 and 2  | -             | 87.64 (16.73)          | 53.5 – 142 (24)    | 7.52 (<0.001)**                          | 1.85 (0.066)                             |
| CP – Right motor speed       | -             | 79.56 (23.34)          | 34 – 153 (32)      | -12.25 (<0.001)**                        | -0.36 (0.716)                            |
| CP – Left motor speed        | -             | 81.36 (17.80)          | 39 – 131 (26)      | -12.07 (<0.001)**                        | 0.20 (0.842)                             |
| CP – FAS Phonological flow   | -             | 54.70 (14.53)          | 14 – 95 (19.75)    | -0.61 (0.541)                            | -2.58 (0.011)                            |
| CP – FAS Semantic flow       | -             | 51.00 (10.14)          | 27 – 81 (13)       | -2.93 (0.004)*                           | -3.93 (<0.001)                           |

TISSUE-SPECIFIC BRAIN AGE PREDICTION 30

|                                                     |   |                 |                          |                   |                |
|-----------------------------------------------------|---|-----------------|--------------------------|-------------------|----------------|
| CP – Visual WM forward ls                           | - | 4.23 (1.01)     | 2 – 7 (2)                | -5.31 (<0.001)**  | 0.29 (0.774)   |
| CP – Visual WM forward ss                           | - | 5.45 (1.87)     | 1 – 10 (3)               | -6.59 (<0.001)**  | -0.25 (0.803)  |
| CP – Visual WM backward ls                          | - | 3.80 (1.28)     | 0 – 8 (1)                | -4.60 (<0.001)**  | -1.85 (0.065)  |
| CP – Visual WM backward ss                          | - | 4.56 (2.08)     | 0 – 12 (3)               | -5.48 (<0.001)**  | -1.02 (0.309)  |
| CP – Visual WM ss                                   | - | 9.96 (3.57)     | 1 – 21 (4)               | -7.04 (<0.001)**  | -0.95 (0.342)  |
| CP – Spatial stroop congruent (ms)                  | - | 674.42 (132.77) | 410 – 1159 (181)         | 8.52 (<0.001)**   | -1.03 (0.304)  |
| CP – Spatial stroop incongruent (ms)                | - | 929.52 (198.01) | 462 – 1827 (269)         | 9.41 (<0.001)**   | -0.75 (0.451)  |
| CP – Spatial stroop Errors                          | - | 2.17 (2.41)     | 0 – 11 (3)               | 0.73 (0.463)      | 1.59 (0.113)   |
| CP – Spatial stroop numb of reps                    | - | 119.63 (16.64)  | 55 – 166 (22)            | -9.67 (<0.001)**  | 1.23 (0.219)   |
| CP – Spatial stroop incong – cong (ms)              | - | 252 (110)       | 20 – 678 (134.5)         | 5.73 (<0.001)**   | -0.68 (0.498)  |
| CP – Spatspan ls                                    | - | 5.37 (1.78)     | 1 – 10 (2)               | -9.12 (<0.001)**  | -4.88 (<0.001) |
| CP – Spatspan tot                                   | - | 29.87 (12.43)   | 3 – 55 (18)              | -9.28 (<0.001)**  | -4.66 (<0.001) |
| CP – Coding corr                                    | - | 54.50 (12.11)   | 24 – 88 (16)             | -16.69 (<0.001)** | -2.46 (0.015)  |
| CP – Coding error                                   | - | 0.67 (0.99)     | 0 – 5 (1)                | -1.10 (0.271)     | 1.56 (0.121)   |
| TVA – Short-term memory storage ( <i>K</i> )        | - | 3.38 (0.77)     | 1.46 – 5.53 (1.09)       | -7.75 (<0.001)**  | -1.52 (0.129)  |
| TVA – Processing speed ( <i>C</i> )                 | - | 31.55 (14.07)   | 5.99 – 89.67 (14.75)     | -4.69 (<0.001)**  | 0.41 (0.6847)  |
| TVA – Perceptual threshold ( <i>t<sub>0</sub></i> ) | - | 23.01 (14.05)   | 0 – 79.75 (17.59)        | 5.72 (<0.001)**   | -1.94 (0.053)  |
| TVA – Error rate                                    | - | 0.10 (0.06)     | 0.0035 – 0.3316 (0.0983) | -1.35 (0.177)     | 0.67 (0.502)   |
| Cluster 1                                           | - | -               | -                        | -7.19 (<0.001)**  | -5.16 (<0.001) |
| Cluster 2                                           | - | -               | -                        | -7.28 (<0.001)**  | 1.61 (0.110)   |
| Cluster 3                                           | - | -               | -                        | -2.01 (0.045)*    | -3.99 (<0.001) |
| Cluster 4                                           | - | -               | -                        | -9.98 (<0.001)**  | 1.25 (0.212)   |
| Cluster 5                                           | - | -               | -                        | -6.86 (<0.001)**  | -2.56 (0.011)  |
| Cluster 6                                           | - | -               | -                        | -15.79 (<0.001)** | -1.08 (0.282)  |
| Cluster 7                                           | - | -               | -                        | -6.50 (<0.001)**  | -0.77 (0.440)  |

837 Table 1. Demographics and cognitive information. \* significant associations between  
838 cognitive measures with age after FDR correction, \*\* significant associations between  
839 cognitive measures with age after Bonferroni correction

840

841

842

843 Cognitive associations with Brain Age Gap (BAG) – statistics

| Test                         | Adj R <sup>2</sup> no-BAG | BAG      | Main effect Age<br><i>t</i> ( <i>p</i> ) | Main effect Sex<br><i>t</i> ( <i>p</i> ) | Main effect BAG<br><i>t</i> ( <i>p</i> ) | Adj R <sup>2</sup> |
|------------------------------|---------------------------|----------|------------------------------------------|------------------------------------------|------------------------------------------|--------------------|
| MoCA                         | 0.0907                    | T1       | -4.5596 (<0.001)                         | -2.3145 (0.021)                          | -0.124 (0.901)                           | 0.0878             |
|                              |                           | DTI      | -4.5599 (<0.001)                         | -2.3155 (0.021)                          | 1.5914 (0.113)                           | 0.0966             |
|                              |                           | Combined | -4.5653 (<0.001)                         | -2.3176 (0.021)                          | -0.4626 (0.644)                          | 0.0885             |
| WASI words                   | 0.0731                    | T1       | 4.7118 (<0.001)                          | 0.1020 (0.919)                           | -0.2169 (0.828)                          | 0.0704             |
|                              |                           | DTI      | 4.7056 (<0.001)                          | 0.1121 (0.911)                           | -0.8126 (0.417)                          | 0.0727             |
|                              |                           | Combined | 4.7091 (<0.001)                          | 0.1041 (0.917)                           | -0.4827 (0.630)                          | 0.0711             |
| WASI matrix                  | 0.1791                    | T1       | -7.6061 (<0.001)                         | -0.2785 (0.781)                          | -0.9158 (0.361)                          | 0.1793             |
|                              |                           | DTI      | -7.6610 (<0.001)                         | -0.2624 (0.793)                          | -1.6546 (0.099)                          | 0.1854             |
|                              |                           | Combined | -7.6128 (<0.001)                         | -0.2726 (0.785)                          | -1.1102 (0.268)                          | 0.1806             |
| CVLT learning 1-5            | 0.1810                    | T1       | -5.0373 (<0.001)                         | -5.2514 (<0.001)                         | -0.2505 (0.802)                          | 0.1750             |
|                              |                           | DTI      | -5.0418 (<0.001)                         | -5.2533 (<0.001)                         | -0.3608 (0.719)                          | 0.1753             |
|                              |                           | Combined | -5.0387 (<0.001)                         | -5.2522 (<0.001)                         | -0.2492 (0.803)                          | 0.1750             |
| CVLT interference            | 0.0664                    | T1       | -4.3256 (<0.001)                         | -0.4062 (0.685)                          | -0.9588 (0.339)                          | 0.0626             |
|                              |                           | DTI      | -4.3218 (<0.001)                         | -0.4104 (0.682)                          | -0.2391 (0.811)                          | 0.0594             |
|                              |                           | Combined | -4.3202 (<0.001)                         | -0.4101 (0.682)                          | -0.1875 (0.851)                          | 0.0594             |
| CVLT recall                  | 0.2438                    | T1       | -6.4897 (<0.001)                         | -5.9257 (<0.001)                         | -0.4868 (0.627)                          | 0.2397             |
|                              |                           | DTI      | -6.4885 (<0.001)                         | -5.9257 (<0.001)                         | -0.1245 (0.901)                          | 0.2391             |
|                              |                           | Combined | -6.5080 (<0.001)                         | -5.9373 (<0.001)                         | -1.1114 (0.268)                          | 0.2427             |
| CVLT delayed recall          | 0.1850                    | T1       | -4.9636 (<0.001)                         | -5.4973 (<0.001)                         | 0.1421 (0.887)                           | 0.1808             |
|                              |                           | DTI      | -4.9611 (<0.001)                         | -5.4969 (<0.001)                         | 0.224 (0.823)                            | 0.1809             |
|                              |                           | Combined | -4.9655 (<0.001)                         | -5.4954 (<0.001)                         | -0.3038 (0.762)                          | 0.1810             |
| CVLT recognition hits        | 0.0494                    | T1       | -2.6125 (0.010)                          | -2.6822 (0.008)                          | -0.8586 (0.391)                          | 0.0486             |
|                              |                           | DTI      | -2.6144 (0.010)                          | -2.6786 (0.008)                          | 0.0946 (0.925)                           | 0.0459             |
|                              |                           | Combined | -2.6212 (0.009)                          | -2.6854 (0.008)                          | -1.0724 (0.285)                          | 0.0501             |
| CVLT recognition errors      | 0.1526                    | T1       | 5.2227 (<0.001)                          | 4.1850 (<0.001)                          | -0.8471 (0.398)                          | 0.1528             |
|                              |                           | DTI      | 5.2115 (<0.001)                          | 4.1755 (<0.001)                          | -0.5651 (0.573)                          | 0.1514             |
|                              |                           | Combined | 5.2139 (<0.001)                          | 4.1740 (<0.001)                          | -0.2537 (0.800)                          | 0.1506             |
| CVLT recog misses            | 0.0494                    | T1       | 2.6125 (0.010)                           | 2.6822 (0.008)                           | 0.8586 (0.391)                           | 0.0486             |
|                              |                           | DTI      | 2.6144 (0.010)                           | 2.6786 (0.008)                           | -0.0946 (0.925)                          | 0.0459             |
|                              |                           | Combined | 2.6212 (0.009)                           | 2.6854 (0.008)                           | 1.0724 (0.285)                           | 0.0501             |
| CVLT recog false alarm       | 0.1150                    | T1       | 4.4519 (<0.001)                          | 3.5827 (<0.001)                          | -0.776 (0.439)                           | 0.1146             |
|                              |                           | DTI      | 4.4378 (<0.001)                          | 3.5803 (<0.001)                          | -0.5207 (0.603)                          | 0.1134             |
|                              |                           | Combined | 4.4418 (<0.001)                          | 3.5788 (<0.001)                          | -0.3488 (0.728)                          | 0.1129             |
| CVLT recog correct rejection | 0.1526                    | T1       | -5.2227 (<0.001)                         | -4.1850 (<0.001)                         | 0.8471 (0.398)                           | 0.1528             |
|                              |                           | DTI      | -5.2115 (<0.001)                         | -4.1755 (<0.001)                         | 0.5651 (0.573)                           | 0.1514             |
|                              |                           | Combined | -5.2139 (<0.001)                         | -4.1740 (<0.001)                         | 0.2537 (0.800)                           | 0.1506             |
| CVLT d'                      | 0.1566                    | T1       | -5.0074 (<0.001)                         | -4.4914 (<0.001)                         | 0.3628 (0.717)                           | 0.1536             |
|                              |                           | DTI      | -5.0021 (<0.001)                         | -4.4969 (<0.001)                         | 0.8538 (0.394)                           | 0.1556             |
|                              |                           | Combined | -5.0038 (<0.001)                         | -4.4902 (<0.001)                         | 0.1699 (0.865)                           | 0.1533             |
| STROOP 1                     | 0.1118                    | T1       | 5.1466 (<0.001)                          | 2.4999 (0.013)                           | 2.6939 (0.008)                           | 0.1299             |

TISSUE-SPECIFIC BRAIN AGE PREDICTION 32

|                             |        |          |                   |                  |                  |        |
|-----------------------------|--------|----------|-------------------|------------------|------------------|--------|
|                             |        | DTI      | 5.0968 (<0.001)   | 2.4769 (0.014)   | 1.6664 (0.097)   | 0.1147 |
|                             |        | Combined | 5.2111 (<0.001)   | 2.5317 (0.012)   | 3.3767 (<0.001)* | 0.1434 |
| STROOP 2                    | 0.0477 | T1       | 2.8868 (0.004)    | 2.2619 (0.025)   | 0.1557 (0.876)   | 0.0433 |
|                             |        | DTI      | 2.8768 (0.004)    | 2.2489 (0.025)   | -0.4639 (0.643)  | 0.0440 |
|                             |        | Combined | 2.8949 (0.004)    | 2.2713 (0.024)   | 0.4976 (0.619)   | 0.0442 |
| STROOP 3                    | 0.2104 | T1       | 7.5930 (<0.001)   | 2.9898 (0.003)   | 1.5092 (0.133)   | 0.2109 |
|                             |        | DTI      | 7.6511 (<0.001)   | 3.0224 (0.003)   | 2.231 (0.027)    | 0.2190 |
|                             |        | Combined | 7.6793 (<0.001)   | 3.0233 (0.003)   | 2.5768 (0.011)   | 0.2240 |
| STROOP 4                    | 0.1887 | T1       | 7.5403 (<0.001)   | 1.7884 (0.075)   | 1.2397 (0.216)   | 0.1906 |
|                             |        | DTI      | 7.5847 (<0.001)   | 1.8121 (0.071)   | 1.7368 (0.084)   | 0.1953 |
|                             |        | Combined | 7.6387 (<0.001)   | 1.8247 (0.069)   | 2.3662 (0.019)   | 0.2033 |
| STROOP mean 1 and 2         | 0.0949 | T1       | 4.5089 (<0.001)   | 2.5033 (0.013)   | 1.5875 (0.114)   | 0.0978 |
|                             |        | DTI      | 4.4750 (<0.001)   | 2.4760 (0.014)   | 0.3927 (0.695)   | 0.0894 |
|                             |        | Combined | 4.5432 (<0.001)   | 2.5399 (0.012)   | 2.0254 (0.044)   | 0.1034 |
| STROOP 3 minus mean 1 and 2 | 0.2051 | T1       | 7.3383 (<0.001)   | 3.0427 (0.003)   | 1.1397 (0.256)   | 0.2021 |
|                             |        | DTI      | 7.3613 (<0.001)   | 3.0703 (0.002)   | 1.3546 (0.177)   | 0.2038 |
|                             |        | Combined | 7.4197 (<0.001)   | 3.1063 (0.002)   | 2.1881 (0.030)   | 0.2130 |
| STROOP 4 minus mean 1 and 2 | 0.1936 | T1       | 7.5360 (<0.001)   | 1.8671 (0.063)   | 0.8763 (0.382)   | 0.1919 |
|                             |        | DTI      | 7.5297 (<0.001)   | 1.8697 (0.063)   | 0.6331 (0.527)   | 0.1907 |
|                             |        | Combined | 7.6081 (<0.001)   | 1.9215 (0.056)   | 1.7531 (0.081)   | 0.1993 |
| CP – Right motor speed      | 0.3695 | T1       | -12.2893 (<0.001) | -0.3592 (0.720)  | -1.5504 (0.122)  | 0.3676 |
|                             |        | DTI      | -12.2318 (<0.001) | -0.3612 (0.718)  | -0.3435 (0.732)  | 0.3620 |
|                             |        | Combined | -12.3125 (<0.001) | -0.3587 (0.720)  | -1.8139 (0.071)  | 0.3697 |
| CP – Left motor speed       | 0.3630 | T1       | -12.1437 (<0.001) | 0.2100 (0.834)   | -1.9945 (0.047)  | 0.3634 |
|                             |        | DTI      | -12.0669 (<0.001) | 0.2081 (0.835)   | -0.8704 (0.385)  | 0.3555 |
|                             |        | Combined | -12.2516 (<0.001) | 0.2149 (0.830)   | -2.9047 (0.004)  | 0.3740 |
| CP – FAS Semantic flow      | 0.0840 | T1       | -2.9562 (0.003)   | -3.9454 (<0.001) | -2.0826 (0.038)  | 0.0960 |
|                             |        | DTI      | -2.9607 (0.003)   | -3.9388 (<0.001) | -2.0997 (0.037)  | 0.0963 |
|                             |        | Combined | -2.9513 (0.004)   | -3.9389 (<0.001) | -1.8308 (0.068)  | 0.0926 |
| CP – Visual WM forward ls   | 0.0936 | T1       | -5.3071 (<0.001)  | 0.2850 (0.776)   | -0.5838 (0.560)  | 0.0906 |
|                             |        | DTI      | -5.3392 (<0.001)  | 0.2963 (0.767)   | -1.7204 (0.087)  | 0.0999 |
|                             |        | Combined | -5.3059 (<0.001)  | 0.2853 (0.776)   | -0.3127 (0.755)  | 0.0897 |
| CP – Visual WM forward ss   | 0.1416 | T1       | -6.5795 (<0.001)  | -0.2502 (0.803)  | -0.2158 (0.829)  | 0.1375 |
|                             |        | DTI      | -6.6000 (<0.001)  | -0.2448 (0.807)  | -1.1695 (0.243)  | 0.1420 |
|                             |        | Combined | -6.5786 (<0.001)  | -0.2496 (0.803)  | -0.02 (0.984)    | 0.1373 |
| CP – Visual WM backward ls  | 0.0852 | T1       | -4.5941 (<0.001)  | -1.8511 (0.065)  | -0.1047 (0.917)  | 0.0820 |
|                             |        | DTI      | -4.6170 (<0.001)  | -1.8545 (0.065)  | -1.3334 (0.184)  | 0.0884 |
|                             |        | Combined | -4.6051 (<0.001)  | -1.8550 (0.065)  | -0.8013 (0.424)  | 0.0843 |
| CP – Visual WM backward ss  | 0.1022 | T1       | -5.4741 (<0.001)  | -1.0181 (0.310)  | -0.2721 (0.786)  | 0.1015 |
|                             |        | DTI      | -5.4971 (<0.001)  | -1.0179 (0.310)  | -1.3043 (0.193)  | 0.1072 |
|                             |        | Combined | -5.4898 (<0.001)  | -1.0215 (0.308)  | -1.0074 (0.315)  | 0.1048 |
| CP – Visual WM ss           | 0.1607 | T1       | -7.0322 (<0.001)  | -0.9515 (0.342)  | -0.3013 (0.763)  | 0.1591 |
|                             |        | DTI      | -7.0622 (<0.001)  | -0.9511 (0.342)  | -1.3634 (0.174)  | 0.1649 |



TISSUE-SPECIFIC BRAIN AGE PREDICTION 33

|                                      |        |          |                   |                  |                    |        |
|--------------------------------------|--------|----------|-------------------|------------------|--------------------|--------|
|                                      |        | Combined | -7.0399 (<0.001)  | -0.9528 (0.342)  | -0.6665 (0.506)    | 0.1603 |
| CP – Spatial stroop congruent        | 0.2288 | T1       | 8.6156 (<0.001)   | -1.0080 (0.314)  | 2.1921 (0.029)     | 0.2288 |
|                                      |        | DTI      | 8.6687 (<0.001)   | -1.0021 (0.317)  | 2.6995 (0.007)     | 0.2362 |
|                                      |        | Combined | 8.8278 (<0.001)   | -0.9828 (0.327)  | 3.9007 (<0.001)**  | 0.2588 |
| CP – Spatial stroop incongruent      | 0.2548 | T1       | 9.5489 (<0.001)   | -0.7429 (0.458)  | 2.6569 (0.008)     | 0.2700 |
|                                      |        | DTI      | 9.5931 (<0.001)   | -0.7587 (0.449)  | 2.8817 (0.004)     | 0.2735 |
|                                      |        | Combined | 9.7197 (<0.001)   | -0.7378 (0.461)  | 3.8071 (<0.001)**  | 0.2903 |
| CP – Spatial stroop numb of reps     | 0.2731 | T1       | -9.7755 (<0.001)  | 1.2211 (0.223)   | -2.2212 (0.027)    | 0.2753 |
|                                      |        | DTI      | -9.8507 (<0.001)  | 1.2328 (0.219)   | -2.9614 (0.003)    | 0.2859 |
|                                      |        | Combined | -9.9891 (<0.001)  | 1.2198 (0.224)   | -3.8816 (<0.001)** | 0.3027 |
| CP – Spatial stroop incong – cong    | 0.1012 | T1       | 5.7663 (<0.001)   | -0.6595 (0.510)  | 1.5611 (0.120)     | 0.1134 |
|                                      |        | DTI      | 5.7466 (<0.001)   | -0.6678 (0.505)  | 0.9705 (0.333)     | 0.1081 |
|                                      |        | Combined | 5.7568 (<0.001)   | -0.6584 (0.511)  | 1.2056 (0.229)     | 0.1099 |
| CP – Spatspan 1s                     | 0.3055 | T1       | -9.1038 (<0.001)  | -4.8656 (<0.001) | -0.032 (0.975)     | 0.3009 |
|                                      |        | DTI      | -9.1746 (<0.001)  | -4.9104 (<0.001) | -1.5749 (0.117)    | 0.3077 |
|                                      |        | Combined | -9.1043 (<0.001)  | -4.8663 (<0.001) | -0.075 (0.940)     | 0.3009 |
| CP – Spatspan total                  | 0.3057 | T1       | -9.2664 (<0.001)  | -4.6439 (<0.001) | 0.1074 (0.915)     | 0.3024 |
|                                      |        | DTI      | -9.3260 (<0.001)  | -4.6815 (<0.001) | -1.3773 (0.170)    | 0.3076 |
|                                      |        | Combined | -9.2686 (<0.001)  | -4.6461 (<0.001) | -0.0612 (0.951)    | 0.3024 |
| CP – Coding corr                     | 0.5387 | T1       | -16.7647 (<0.001) | -2.5004 (0.013)  | -1.6149 (0.108)    | 0.5352 |
|                                      |        | DTI      | -17.0893 (<0.001) | -2.5467 (0.012)  | -3.3998 (<0.001)*  | 0.5510 |
|                                      |        | Combined | -17.0071 (<0.001) | -2.5604 (0.011)  | -3.0056 (0.003)    | 0.5467 |
| TVA - Short-term memory storage (K)  | 0.2013 | T1       | -7.7691 (<0.001)  | -1.5196 (0.130)  | -1.1179 (0.265)    | 0.1981 |
|                                      |        | DTI      | -7.8117 (<0.001)  | -1.5383 (0.125)  | -2.0302 (0.043)    | 0.2070 |
|                                      |        | Combined | -7.7525 (<0.001)  | -1.5195 (0.130)  | -0.9537 (0.341)    | 0.1970 |
| TVA - Perceptual threshold ( $t_0$ ) | 0.0764 | T1       | 5.7303 (<0.001)   | -1.9470 (0.053)  | 0.9617 (0.337)     | 0.1141 |
|                                      |        | DTI      | 5.7333 (<0.001)   | -1.9444 (0.053)  | 1.1066 (0.270)     | 0.1152 |
|                                      |        | Combined | 5.7523 (<0.001)   | -1.9587 (0.051)  | 1.8346 (0.068)     | 0.1226 |
| TVA - Processing speed (C)           | 0.1304 | T1       | -4.6692 (<0.001)  | 0.3969 (0.692)   | 0.8093 (0.419)     | 0.0723 |
|                                      |        | DTI      | -4.6800 (<0.001)  | 0.4053 (0.686)   | 0.1402 (0.889)     | 0.0699 |
|                                      |        | Combined | -4.6827 (<0.001)  | 0.3944 (0.694)   | 0.8916 (0.374)     | 0.0728 |
| Cluster 1                            | 0.2470 | T1       | -7.1741 (<0.001)  | -5.1567 (<0.001) | -0.1927 (0.847)    | 0.2440 |
|                                      |        | DTI      | -7.1623 (<0.001)  | -5.1410 (<0.001) | 0.3683 (0.713)     | 0.2443 |
|                                      |        | Combined | -7.1805 (<0.001)  | -5.1641 (<0.001) | -0.3879 (0.699)    | 0.2443 |
| Cluster 2                            | 0.1720 | T1       | -7.2680 (<0.001)  | 1.6030 (0.110)   | -0.1013 (0.919)    | 0.1687 |
|                                      |        | DTI      | -7.2785 (<0.001)  | 1.6062 (0.110)   | -0.6549 (0.513)    | 0.1701 |
|                                      |        | Combined | -7.2740 (<0.001)  | 1.6104 (0.109)   | -0.6382 (0.524)    | 0.1700 |
| Cluster 3                            | 0.0698 | T1       | -2.0177 (0.045)   | -3.9824 (<0.001) | -0.8103 (0.419)    | 0.0686 |
|                                      |        | DTI      | -2.0337 (0.043)   | -3.9969 (<0.001) | -1.84 (0.067)      | 0.0783 |
|                                      |        | Combined | -2.0185 (0.045)   | -3.9877 (<0.001) | -0.9765 (0.330)    | 0.0697 |
| Cluster 4                            | 0.2783 | T1       | -10.1319 (<0.001) | 1.2314 (0.219)   | -2.5436 (0.012)    | 0.2937 |
|                                      |        | DTI      | -10.1479 (<0.001) | 1.2377 (0.217)   | -2.5207 (0.012)    | 0.2933 |
|                                      |        | Combined | -10.3013 (<0.001) | 1.2196 (0.224)   | -3.6163 (<0.001)*  | 0.3113 |

TISSUE-SPECIFIC BRAIN AGE PREDICTION 34

|           |        |          |                   |                 |                 |        |
|-----------|--------|----------|-------------------|-----------------|-----------------|--------|
| Cluster 5 | 0.1772 | T1       | -6.8872 (<0.001)  | -2.5902 (0.010) | -1.1084 (0.269) | 0.1779 |
|           |        | DTI      | -6.8667 (<0.001)  | -2.5805 (0.010) | -0.5825 (0.561) | 0.1750 |
|           |        | Combined | -6.9577 (<0.001)  | -2.6481 (0.009) | -1.9103 (0.057) | 0.1858 |
| Cluster 6 | 0.5092 | T1       | -15.9345 (<0.001) | -1.1148 (0.266) | -1.8971 (0.059) | 0.5145 |
|           |        | DTI      | -15.9719 (<0.001) | -1.1080 (0.269) | -2.0875 (0.038) | 0.5160 |
|           |        | Combined | -16.0156 (<0.001) | -1.1196 (0.264) | -2.459 (0.015)  | 0.5193 |
| Cluster 7 | 0.1399 | T1       | -6.4852 (<0.001)  | -0.7736 (0.440) | -0.3433 (0.732) | 0.1369 |
|           |        | DTI      | -6.5210 (<0.001)  | -0.7689 (0.443) | -1.6007 (0.111) | 0.1452 |
|           |        | Combined | -6.4926 (<0.001)  | -0.7759 (0.439) | -0.63 (0.529)   | 0.1379 |

---

844 Table 2. Cognitive associations with BAG – statistics. \* FDR significant \*\* Bonferroni  
845 significant.

846  
847  
848  
849  
850  
851  
852  
853  
854  
855  
856  
857  
858  
859  
860  
861  
862  
863  
864  
865  
866  
867  
868  
869

870 **Supplementary Figures**

871

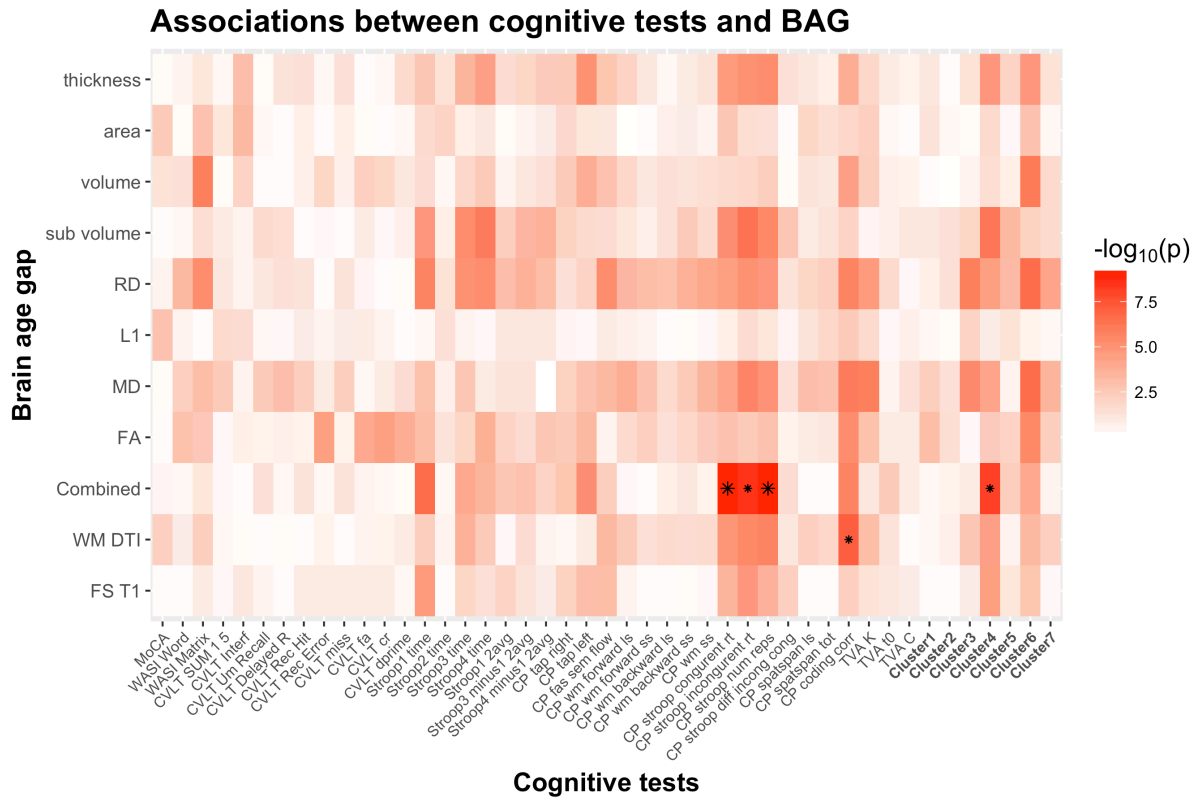

872

873 **Fig. S1.** Heatmap of the association between cognitive scores and brain age gaps using non-  
 874 linear models, including age, age<sup>2</sup> and sex as covariates. The color scale depicts the minus log  
 875 of the p-values ( $-\log_{10}(p)$ ) for each association. The association marked with a small star  
 876 represents significant associations after FDR correction, and the one marked with a big star  
 877 shows significant associations after Bonferroni correction.

878

879

880

881

882

883

884

885

886

887

888

TISSUE-SPECIFIC BRAIN AGE PREDICTION 36

889 **Supplementary Tables**

890 Cognitive associations with Brain Age Gap (BAG) using non-linear models, including age,  
 891 age<sup>2</sup> and sex as covariates – statistics.

| Test                         | Adj R <sup>2</sup> no-BAG | BAG      | Main effect Age<br>t(p) | Main effect Age <sup>2</sup><br>t(p) | Main effect Sex<br>t(p) | Main effect BAG<br>t(p) | Adj R <sup>2</sup> |
|------------------------------|---------------------------|----------|-------------------------|--------------------------------------|-------------------------|-------------------------|--------------------|
| MoCA                         | 0.088                     | T1       | -4.5563 (<0.001)        | -0.2752 (0.7834)                     | -2.1792 (0.0302)        | -0.1146 (0.9088)        | 0.0845             |
|                              |                           | DTI      | -4.5575 (<0.001)        | -0.3078 (0.7585)                     | -2.1727 (0.0307)        | 1.5937 (0.1122)         | 0.0934             |
|                              |                           | Combined | -4.561 (<0.001)         | -0.2413 (0.8095)                     | -2.1894 (0.0295)        | -0.4399 (0.6604)        | 0.0851             |
| WASI words                   | 0.0792                    | T1       | 4.7079 (<0.001)         | -1.5614 (0.1197)                     | 0.4698 (0.6389)         | -0.1719 (0.8637)        | 0.0756             |
|                              |                           | DTI      | 4.7017 (<0.001)         | -1.5532 (0.1216)                     | 0.4775 (0.6334)         | -0.7843 (0.4336)        | 0.0778             |
|                              |                           | Combined | 4.7058 (<0.001)         | -1.5325 (0.1266)                     | 0.4655 (0.642)          | -0.3554 (0.7226)        | 0.076              |
| WASI matrix                  | 0.1825                    | T1       | -7.6085 (<0.001)        | -1.3223 (0.1873)                     | 0.048 (0.9618)          | -0.8787 (0.3804)        | 0.1817             |
|                              |                           | DTI      | -7.6627 (<0.001)        | -1.311 (0.1911)                      | 0.0606 (0.9517)         | -1.6227 (0.1059)        | 0.1876             |
|                              |                           | Combined | -7.6132 (<0.001)        | -1.2678 (0.206)                      | 0.0407 (0.9676)         | -1.0117 (0.3126)        | 0.1825             |
| CVLT learning 1-5            | 0.1757                    | T1       | -5.0181 (<0.001)        | 0.5198 (0.6036)                      | -5.2162 (<0.001)        | -0.2662 (0.7903)        | 0.1727             |
|                              |                           | DTI      | -5.0228 (<0.001)        | 0.5204 (0.6032)                      | -5.2181 (<0.001)        | -0.3723 (0.71)          | 0.1729             |
|                              |                           | Combined | -5.0196 (<0.001)        | 0.5363 (0.5922)                      | -5.2205 (<0.001)        | -0.2959 (0.7675)        | 0.1727             |
| CVLT interference            | 0.0593                    | T1       | -4.3175 (<0.001)        | -0.062 (0.9506)                      | -0.3788 (0.7051)        | -0.9545 (0.3407)        | 0.0589             |
|                              |                           | DTI      | -4.3143 (<0.001)        | -0.086 (0.9316)                      | -0.3772 (0.7064)        | -0.2366 (0.8132)        | 0.0558             |
|                              |                           | Combined | -4.3124 (<0.001)        | -0.075 (0.9403)                      | -0.3794 (0.7047)        | -0.1796 (0.8576)        | 0.0557             |
| CVLT recall                  | 0.2401                    | T1       | -6.4676 (<0.001)        | 0.6091 (0.543)                       | -5.8925 (<0.001)        | -0.5048 (0.6141)        | 0.2379             |
|                              |                           | DTI      | -6.4667 (<0.001)        | 0.5965 (0.5514)                      | -5.8892 (<0.001)        | -0.1381 (0.8902)        | 0.2371             |
|                              |                           | Combined | -6.4859 (<0.001)        | 0.6973 (0.4863)                      | -5.9255 (<0.001)        | -1.1682 (0.2438)        | 0.2412             |
| CVLT delayed recall          | 0.1822                    | T1       | -4.9433 (<0.001)        | 0.6624 (0.5083)                      | -5.4919 (<0.001)        | 0.1193 (0.9052)         | 0.179              |
|                              |                           | DTI      | -4.9411 (<0.001)        | 0.6618 (0.5087)                      | -5.4912 (<0.001)        | 0.2079 (0.8354)         | 0.1791             |
|                              |                           | Combined | -4.9454 (<0.001)        | 0.6981 (0.4857)                      | -5.4986 (<0.001)        | -0.3668 (0.7141)        | 0.1794             |
| CVLT recognition hits        | 0.0464                    | T1       | -2.615 (0.0095)         | -0.3694 (0.7121)                     | -2.5144 (0.0125)        | -0.8444 (0.3992)        | 0.0453             |
|                              |                           | DTI      | -2.6175 (0.0094)        | -0.3994 (0.6899)                     | -2.504 (0.0129)         | 0.1039 (0.9173)         | 0.0427             |
|                              |                           | Combined | -2.622 (0.0093)         | -0.3004 (0.7641)                     | -2.5328 (0.0119)        | -1.0382 (0.3002)        | 0.0467             |
| CVLT recognition errors      | 0.1567                    | T1       | 5.2609 (<0.001)         | 1.4118 (0.1592)                      | 3.7395 (<0.001)         | -0.8964 (0.3709)        | 0.1561             |
|                              |                           | DTI      | 5.2485 (<0.001)         | 1.3947 (0.1643)                      | 3.7336 (<0.001)         | -0.5993 (0.5495)        | 0.1546             |
|                              |                           | Combined | 5.2514 (<0.001)         | 1.4099 (0.1598)                      | 3.7277 (<0.001)         | -0.3837 (0.7015)        | 0.1539             |
| CVLT recog misses            | 0.0464                    | T1       | 2.615 (0.0095)          | 0.3694 (0.7121)                      | 2.5144 (0.0125)         | 0.8444 (0.3992)         | 0.0453             |
|                              |                           | DTI      | 2.6175 (0.0094)         | 0.3994 (0.6899)                      | 2.504 (0.0129)          | -0.1039 (0.9173)        | 0.0427             |
|                              |                           | Combined | 2.622 (0.0093)          | 0.3004 (0.7641)                      | 2.5328 (0.0119)         | 1.0382 (0.3002)         | 0.0467             |
| CVLT recog false alarm       | 0.1191                    | T1       | 4.4883 (<0.001)         | 1.4053 (0.1612)                      | 3.1557 (0.0018)         | -0.8236 (0.411)         | 0.1179             |
|                              |                           | DTI      | 4.4728 (<0.001)         | 1.3906 (0.1656)                      | 3.1567 (0.0018)         | -0.5544 (0.5798)        | 0.1167             |
|                              |                           | Combined | 4.4784 (<0.001)         | 1.4159 (0.158)                       | 3.1475 (0.0018)         | -0.4786 (0.6326)        | 0.1164             |
| CVLT recog correct rejection | 0.1567                    | T1       | -5.2609 (<0.001)        | -1.4118 (0.1592)                     | -3.7395 (<0.001)        | 0.8964 (0.3709)         | 0.1561             |
|                              |                           | DTI      | -5.2485 (<0.001)        | -1.3947 (0.1643)                     | -3.7336 (<0.001)        | 0.5993 (0.5495)         | 0.1546             |
|                              |                           | Combined | -5.2514 (<0.001)        | -1.4099 (0.1598)                     | -3.7277 (<0.001)        | 0.3837 (0.7015)         | 0.1539             |
| CVLT d'                      | 0.1548                    | T1       | -5.0157 (<0.001)        | -0.7018 (0.4835)                     | -4.1938 (<0.001)        | 0.3855 (0.7002)         | 0.1519             |

TISSUE-SPECIFIC BRAIN AGE PREDICTION 37

|                             |        |          |                   |                   |                  |                  |        |
|-----------------------------|--------|----------|-------------------|-------------------|------------------|------------------|--------|
|                             |        | DTI      | -5.0104 (<0.001)  | -0.7106 (0.478)   | -4.1973 (<0.001) | 0.8695 (0.3854)  | 0.1539 |
|                             |        | Combined | -5.0122 (<0.001)  | -0.7079 (0.4796)  | -4.1897 (<0.001) | 0.2343 (0.8149)  | 0.1516 |
| STROOP 1                    | 0.1181 | T1       | 5.2178 (<0.001)   | 1.8817 (0.061)    | 1.9786 (0.0489)  | 2.6477 (0.0086)  | 0.1385 |
|                             |        | DTI      | 5.1698 (<0.001)   | 1.915 (0.0566)    | 1.9488 (0.0524)  | 1.6361 (0.103)   | 0.1239 |
|                             |        | Combined | 5.2707 (<0.001)   | 1.7146 (0.0876)   | 2.0444 (0.0419)  | 3.243 (0.0013)   | 0.1499 |
| STROOP 2                    | 0.0565 | T1       | 2.955 (0.0034)    | 1.8769 (0.0617)   | 1.7273 (0.0853)  | 0.0898 (0.9286)  | 0.0528 |
|                             |        | DTI      | 2.9455 (0.0035)   | 1.897 (0.059)     | 1.7093 (0.0886)  | -0.5228 (0.6016) | 0.0538 |
|                             |        | Combined | 2.9595 (0.0034)   | 1.8439 (0.0664)   | 1.7389 (0.0833)  | 0.3307 (0.7411)  | 0.0531 |
| STROOP 3                    | 0.2519 | T1       | 7.9387 (<0.001)   | 4.0215 (<0.001)** | 2.0391 (0.0425)  | 1.4584 (0.146)   | 0.2552 |
|                             |        | DTI      | 8.0033 (<0.001)   | 4.0506 (<0.001)** | 2.0666 (0.0398)  | 2.245 (0.0256)   | 0.2635 |
|                             |        | Combined | 8.0064 (<0.001)   | 3.9001 (<0.001)** | 2.0915 (0.0375)  | 2.3542 (0.0193)  | 0.265  |
| STROOP 4                    | 0.2092 | T1       | 7.727 (<0.001)    | 2.7144 (0.0071)   | 1.1078 (0.269)   | 1.1959 (0.2329)  | 0.2105 |
|                             |        | DTI      | 7.7745 (<0.001)   | 2.7322 (0.0067)   | 1.1277 (0.2605)  | 1.7316 (0.0846)  | 0.2154 |
|                             |        | Combined | 7.8094 (<0.001)   | 2.5945 (0.01)     | 1.1659 (0.2448)  | 2.2006 (0.0287)  | 0.221  |
| STROOP mean 1 and 2         | 0.1065 | T1       | 4.6014 (<0.001)   | 2.1809 (0.0301)   | 1.8851 (0.0606)  | 1.5137 (0.1314)  | 0.1111 |
|                             |        | DTI      | 4.5693 (<0.001)   | 2.2194 (0.0274)   | 1.8487 (0.0657)  | 0.3205 (0.7489)  | 0.1033 |
|                             |        | Combined | 4.6255 (<0.001)   | 2.0629 (0.0402)   | 1.9411 (0.0534)  | 1.8349 (0.0677)  | 0.1148 |
| STROOP 3 minus mean 1 and 2 | 0.2486 | T1       | 7.6928 (<0.001)   | 4.0734 (<0.001)** | 2.0223 (0.0442)  | 1.0347 (0.3018)  | 0.2488 |
|                             |        | DTI      | 7.7161 (<0.001)   | 4.0759 (<0.001)** | 2.0485 (0.0416)  | 1.2741 (0.2038)  | 0.2504 |
|                             |        | Combined | 7.7517 (<0.001)   | 3.9419 (<0.001)** | 2.0994 (0.0368)  | 1.8804 (0.0612)  | 0.2561 |
| STROOP 4 minus mean 1 and 2 | 0.2225 | T1       | 7.7912 (<0.001)   | 3.224 (0.0014)*   | 1.0274 (0.3052)  | 0.7875 (0.4317)  | 0.2213 |
|                             |        | DTI      | 7.7853 (<0.001)   | 3.233 (0.0014)*   | 1.0273 (0.3053)  | 0.5573 (0.5778)  | 0.2203 |
|                             |        | Combined | 7.8437 (<0.001)   | 3.1135 (0.0021)*  | 1.0945 (0.2748)  | 1.4951 (0.1362)  | 0.2263 |
| CP - Right motor speed      | 0.3621 | T1       | -12.2583 (<0.001) | 0.4241 (0.6718)   | -0.4499 (0.6532) | -1.56 (0.12)     | 0.3656 |
|                             |        | DTI      | -12.201 (<0.001)  | 0.3813 (0.7033)   | -0.4415 (0.6592) | -0.3491 (0.7273) | 0.3599 |
|                             |        | Combined | -12.2818 (<0.001) | 0.5259 (0.5994)   | -0.4741 (0.6358) | -1.8479 (0.0658) | 0.368  |
| CP - Left motor speed       | 0.3586 | T1       | -12.1901 (<0.001) | -1.3758 (0.1701)  | 0.5329 (0.5946)  | -1.9551 (0.0517) | 0.3656 |
|                             |        | DTI      | -12.1163 (<0.001) | -1.4124 (0.159)   | 0.5396 (0.5899)  | -0.8474 (0.3976) | 0.3579 |
|                             |        | Combined | -12.2849 (<0.001) | -1.2158 (0.2252)  | 0.4997 (0.6177)  | -2.7995 (0.0055) | 0.3752 |
| CP - FAS semantic flow      | 0.1047 | T1       | -3.0413 (0.0026)  | -2.5748 (0.0106)  | -3.2544 (0.0013) | -2.0265 (0.0437) | 0.1153 |
|                             |        | DTI      | -3.0473 (0.0025)  | -2.6035 (0.0098)  | -3.2424 (0.0013) | -2.0796 (0.0385) | 0.116  |
|                             |        | Combined | -3.0316 (0.0027)  | -2.4889 (0.0134)  | -3.2639 (0.0012) | -1.642 (0.1018)  | 0.1105 |
| CP - Visual WM forward ls   | 0.0897 | T1       | -5.3048 (<0.001)  | -0.2803 (0.7795)  | 0.3424 (0.7323)  | -0.5645 (0.5729) | 0.0873 |
|                             |        | DTI      | -5.3364 (<0.001)  | -0.2747 (0.7838)  | 0.352 (0.7252)   | -1.71 (0.0885)   | 0.0966 |
|                             |        | Combined | -5.3039 (<0.001)  | -0.2873 (0.7742)  | 0.3445 (0.7307)  | -0.2836 (0.7769) | 0.0864 |
| CP - Visual WM forward ss   | 0.1388 | T1       | -6.5947 (<0.001)  | -0.6439 (0.5202)  | -0.0916 (0.9271) | -0.1756 (0.8608) | 0.1355 |
|                             |        | DTI      | -6.6142 (<0.001)  | -0.6289 (0.53)    | -0.0903 (0.9281) | -1.1522 (0.2503) | 0.1399 |
|                             |        | Combined | -6.5945 (<0.001)  | -0.657 (0.5118)   | -0.0873 (0.9305) | 0.0421 (0.9664)  | 0.1354 |
| CP - Visual WM backward ls  | 0.0852 | T1       | -4.6076 (<0.001)  | -0.9343 (0.351)   | -1.567 (0.1184)  | -0.068 (0.9458)  | 0.0816 |
|                             |        | DTI      | -4.6299 (<0.001)  | -0.9132 (0.362)   | -1.5757 (0.1163) | -1.3135 (0.1902) | 0.0878 |
|                             |        | Combined | -4.6163 (<0.001)  | -0.8736 (0.3831)  | -1.5842 (0.1144) | -0.7237 (0.4699) | 0.0835 |
| CP - Visual WM backward ss  | 0.1026 | T1       | -5.4768 (<0.001)  | -0.619 (0.5365)   | -0.8352 (0.4044) | -0.2473 (0.8049) | 0.0993 |

TISSUE-SPECIFIC BRAIN AGE PREDICTION 38

|                                      |        |          |                   |                  |                  |                    |        |
|--------------------------------------|--------|----------|-------------------|------------------|------------------|--------------------|--------|
|                                      |        | DTI      | -5.4994 (<0.001)  | -0.604 (0.5464)  | -0.8389 (0.4023) | -1.2897 (0.1983)   | 0.105  |
|                                      |        | Combined | -5.4903 (<0.001)  | -0.5466 (0.5852) | -0.8555 (0.3931) | -0.9558 (0.3401)   | 0.1023 |
| CP - Visual WM ss                    | 0.1618 | T1       | -7.0453 (<0.001)  | -0.9494 (0.3433) | -0.6911 (0.4902) | -0.2639 (0.7921)   | 0.1588 |
|                                      |        | DTI      | -7.0749 (<0.001)  | -0.9354 (0.3504) | -0.6944 (0.4881) | -1.3432 (0.1804)   | 0.1645 |
|                                      |        | Combined | -7.051 (<0.001)   | -0.9076 (0.365)  | -0.7016 (0.4836) | -0.5866 (0.558)    | 0.1597 |
| CP - Spatial stroop congruent        | 0.2152 | T1       | 8.6103 (<0.001)   | 0.5061 (0.6132)  | -1.099 (0.2728)  | 2.1677 (0.0311)    | 0.2265 |
|                                      |        | DTI      | 8.6646 (<0.001)   | 0.539 (0.5904)   | -1.1012 (0.2719) | 2.6844 (0.0078)    | 0.234  |
|                                      |        | Combined | 8.8148 (<0.001)   | 0.27 (0.7874)    | -1.0172 (0.3101) | 3.8562 (<0.001)**  | 0.2561 |
| CP - Spatial stroop incongruent      | 0.2498 | T1       | 9.5215 (<0.001)   | -0.3129 (0.7546) | -0.6399 (0.5228) | 2.6625 (0.0083)    | 0.2674 |
|                                      |        | DTI      | 9.5663 (<0.001)   | -0.2497 (0.803)  | -0.6711 (0.5028) | 2.8797 (0.0043)    | 0.2708 |
|                                      |        | Combined | 9.6908 (<0.001)   | -0.5285 (0.5976) | -0.5807 (0.5619) | 3.8325 (<0.001)*   | 0.2883 |
| CP - Spatial stroop numb of reps     | 0.2613 | T1       | -9.7578 (<0.001)  | -0.1542 (0.8776) | 1.2196 (0.2237)  | -2.2091 (0.0281)   | 0.2725 |
|                                      |        | DTI      | -9.8334 (<0.001)  | -0.1782 (0.8587) | 1.2369 (0.2173)  | -2.951 (0.0035)    | 0.2831 |
|                                      |        | Combined | -9.967 (<0.001)   | 0.0905 (0.928)   | 1.1582 (0.2479)  | -3.8672 (<0.001)** | 0.2999 |
| CP - Spatial stroop incong - cong    | 0.1076 | T1       | 5.7387 (<0.001)   | -0.9619 (0.337)  | -0.4011 (0.6887) | 1.5968 (0.1116)    | 0.1131 |
|                                      |        | DTI      | 5.7189 (<0.001)   | -0.9105 (0.3635) | -0.4223 (0.6732) | 0.9815 (0.3273)    | 0.1075 |
|                                      |        | Combined | 5.7304 (<0.001)   | -1.0014 (0.3176) | -0.3888 (0.6978) | 1.2835 (0.2005)    | 0.1099 |
| CP - Spatspan ls                     | 0.3027 | T1       | -9.0803 (<0.001)  | 0.8225 (0.4116)  | -4.9183 (<0.001) | -0.0628 (0.95)     | 0.3    |
|                                      |        | DTI      | -9.1511 (<0.001)  | 0.8555 (0.3931)  | -4.9703 (<0.001) | -1.5904 (0.113)    | 0.307  |
|                                      |        | Combined | -9.0818 (<0.001)  | 0.8301 (0.4073)  | -4.9202 (<0.001) | -0.1448 (0.885)    | 0.3    |
| CP - Spatspan total                  | 0.3033 | T1       | -9.2413 (<0.001)  | 0.5919 (0.5545)  | -4.6451 (<0.001) | 0.085 (0.9324)     | 0.3006 |
|                                      |        | DTI      | -9.3007 (<0.001)  | 0.6245 (0.5329)  | -4.6899 (<0.001) | -1.3875 (0.1665)   | 0.3059 |
|                                      |        | Combined | -9.2443 (<0.001)  | 0.6028 (0.5472)  | -4.6491 (<0.001) | -0.1118 (0.9111)   | 0.3006 |
| CP - Coding corr                     | 0.5307 | T1       | -16.7381 (<0.001) | -0.3279 (0.7433) | -2.3396 (0.0201) | -1.596 (0.1117)    | 0.5335 |
|                                      |        | DTI      | -17.0629 (<0.001) | -0.3481 (0.7281) | -2.3804 (0.018)  | -3.3875 (<0.001)*  | 0.5495 |
|                                      |        | Combined | -16.9736 (<0.001) | -0.1442 (0.8855) | -2.4411 (0.0153) | -2.976 (0.0032)    | 0.5449 |
| TVA - Short-term memory storage (K)  | 0.1941 | T1       | -7.7533 (<0.001)  | -0.0891 (0.9291) | -1.4529 (0.1475) | -1.1129 (0.2668)   | 0.1949 |
|                                      |        | DTI      | -7.7958 (<0.001)  | -0.0894 (0.9288) | -1.471 (0.1426)  | -2.0247 (0.044)    | 0.2039 |
|                                      |        | Combined | -7.7352 (<0.001)  | -0.0343 (0.9726) | -1.4655 (0.144)  | -0.9449 (0.3456)   | 0.1938 |
| TVA - Perceptual threshold ( $t_0$ ) | 0.1146 | T1       | 5.7716 (<0.001)   | 0.9866 (0.3248)  | -2.1312 (0.034)  | 0.9264 (0.3551)    | 0.1141 |
|                                      |        | DTI      | 5.7764 (<0.001)   | 1.0081 (0.3144)  | -2.1342 (0.0338) | 1.0951 (0.2745)    | 0.1153 |
|                                      |        | Combined | 5.784 (<0.001)    | 0.8478 (0.3973)  | -2.1074 (0.0361) | 1.7412 (0.0829)    | 0.1217 |
| TVA - Processing speed (C)           | 0.0699 | T1       | -4.66 (<0.001)    | 0.1122 (0.9107)  | 0.3556 (0.7225)  | 0.804 (0.4222)     | 0.0686 |
|                                      |        | DTI      | -4.6708 (<0.001)  | 0.135 (0.8927)   | 0.3579 (0.7207)  | 0.1387 (0.8898)    | 0.0662 |
|                                      |        | Combined | -4.6734 (<0.001)  | 0.0619 (0.9507)  | 0.3657 (0.7149)  | 0.8815 (0.3789)    | 0.0691 |
| Cluster 1                            | 0.2446 | T1       | -7.1703 (<0.001)  | -0.4829 (0.6296) | -4.8899 (<0.001) | -0.1702 (0.865)    | 0.2416 |
|                                      |        | DTI      | -7.1589 (<0.001)  | -0.5024 (0.6158) | -4.8709 (<0.001) | 0.3825 (0.7024)    | 0.242  |
|                                      |        | Combined | -7.1752 (<0.001)  | -0.4542 (0.6501) | -4.8989 (<0.001) | -0.3391 (0.7349)   | 0.2419 |
| Cluster 2                            | 0.1695 | T1       | -7.2665 (<0.001)  | -0.5147 (0.6072) | 1.6797 (0.0943)  | -0.0814 (0.9352)   | 0.1662 |
|                                      |        | DTI      | -7.2772 (<0.001)  | -0.5154 (0.6068) | 1.6829 (0.0937)  | -0.6514 (0.5154)   | 0.1676 |
|                                      |        | Combined | -7.2707 (<0.001)  | -0.4611 (0.6451) | 1.6725 (0.0957)  | -0.5914 (0.5548)   | 0.1674 |
| Cluster 3                            | 0.0767 | T1       | -2.065 (0.0399)   | -1.6934 (0.0916) | -3.4589 (<0.001) | -0.7735 (0.4399)   | 0.0753 |

TISSUE-SPECIFIC BRAIN AGE PREDICTION 39

|           |        |          |                   |                   |                  |                   |        |
|-----------|--------|----------|-------------------|-------------------|------------------|-------------------|--------|
|           |        | DTI      | -2.0812 (0.0384)  | -1.693 (0.0917)   | -3.4728 (<0.001) | -1.8207 (0.0698)  | 0.0849 |
|           |        | Combined | -2.0636 (0.0401)  | -1.6405 (0.1021)  | -3.4746 (<0.001) | -0.848 (0.3972)   | 0.0757 |
| Cluster 4 | 0.2757 | T1       | -10.1014 (<0.001) | 0.3766 (0.7068)   | 1.098 (0.2733)   | -2.5518 (0.0113)  | 0.2912 |
|           |        | DTI      | -10.118 (<0.001)  | 0.31 (0.7568)     | 1.1208 (0.2635)  | -2.5199 (0.0124)  | 0.2908 |
|           |        | Combined | -10.2703 (<0.001) | 0.5794 (0.5629)   | 1.0357 (0.3014)  | -3.6468 (<0.001)* | 0.3095 |
| Cluster 5 | 0.2124 | T1       | -7.1604 (<0.001)  | -3.4563 (<0.001)* | -1.6891 (0.0924) | -1.0197 (0.3089)  | 0.2125 |
|           |        | DTI      | -7.1405 (<0.001)  | -3.4709 (<0.001)* | -1.6759 (0.095)  | -0.5011 (0.6167)  | 0.21   |
|           |        | Combined | -7.2104 (<0.001)  | -3.3405 (0.001)*  | -1.7586 (0.0799) | -1.6393 (0.1024)  | 0.2177 |
| Cluster 6 | 0.51   | T1       | -15.9382 (<0.001) | -1.0984 (0.2732)  | -0.8171 (0.4147) | -1.8518 (0.0653)  | 0.5149 |
|           |        | DTI      | -15.9778 (<0.001) | -1.1226 (0.2627)  | -0.8054 (0.4214) | -2.0589 (0.0406)  | 0.5165 |
|           |        | Combined | -16.0092 (<0.001) | -0.9591 (0.3385)  | -0.8532 (0.3944) | -2.3608 (0.019)   | 0.5191 |
| Cluster 7 | 0.1381 | T1       | -6.5016 (<0.001)  | -0.6594 (0.5102)  | -0.5961 (0.5516) | -0.3018 (0.7631)  | 0.135  |
|           |        | DTI      | -6.5363 (<0.001)  | -0.643 (0.5208)   | -0.5958 (0.5518) | -1.5824 (0.1148)  | 0.1432 |
|           |        | Combined | -6.5065 (<0.001)  | -0.6229 (0.5339)  | -0.6062 (0.5449) | -0.5676 (0.5708)  | 0.1358 |

892 **Table S1.** Cognitive associations with Brain Age Gap (BAG) using non-linear models,  
893 including age, age<sup>2</sup> and sex as covariates – statistics. \* FDR significant \*\* Bonferroni  
894 significant.  
895
